# Interactions between Nodal and Wnt signalling Drive Robust Symmetry-Breaking and Axial Organisation in *Gastruloids* (Embryonic Organoids)

Turner D.A.\*<sup>1</sup>, Glodowski C.R.<sup>1</sup>, Alonso-Crisostomo L.<sup>1</sup>, Baillie-Johnson P.<sup>1</sup>, Hayward P.C.<sup>1</sup>, Collignon J.<sup>2</sup>, Gustavsen, C.<sup>3</sup>, Serup P.<sup>3</sup>, Schröter C.<sup>1,4</sup>, and Martinez Arias A.\*<sup>1</sup>

<sup>1</sup>Department of Genetics, University of Cambridge, Cambridge, CB2 3EH, United Kingdom

<sup>2</sup>Universit Paris-Diderot, CNRS, Institut Jacques Monod, UMR 7592, Development and Neurobiology Programme, F-75013 Paris, France

<sup>3</sup>Danish Stem Cell Center, University of Copenhagen, DK-2200 Copenhagen, Denmark

<sup>4</sup>Max Planck Institute of Molecular Physiology, Dortmund, Germany

May 4, 2016

## Abstract

Generation of asymmetry within the early embryo is a critical step in the establishment of the three body axes, providing a reference for the patterning of the organism. To study the establishment of asymmetry and the development of the anteroposterior axis (AP) in culture, we utilised our '*Gastruloid*' model system. *Gastruloids*, highly reproducible embryonic organoids formed from aggregates of mouse embryonic stem cells, display symmetry-breaking, polarised gene expression and axial development, mirroring the processes on a time-scale similar to that of the mouse embryo. Using *Gastruloids* formed from mouse ESCs containing reporters for Wnt, FGF and Nodal signalling, we were able to quantitatively assess the contribution of these signalling pathways to the establishment of asymmetry through single time-point and live-cell fluorescence microscopy.

During the first 24-48h of culture, interactions between the Wnt/ $\beta$ -Catenin and Nodal/TGF $\beta$  signalling pathways promote the initial symmetry-breaking event, manifested through polarised *Brachyury* (T/Bra) expression. Neither BMP nor FGF signalling is required for the establishment of asymmetry, however Wnt signalling is essential for the amplification and stability of the initial patterning event. Additionally, low, endogenous levels of FGF (24-48h) has a role in the amplification of the established pattern at later time-points.

Our results confirm that *Gastruloids* behave like epiblast cells in the embryo, leading us to translate the processes and signalling involved in pattern formation of *Gastruloids* in culture to the development of the embryo, firmly establishing *Gastruloids* as a highly reproducible, robust model system for studying cell fate decisions and early pattern formation in culture.

**Key Words** *Gastruloids*, mouse embryonic stem cells, symmetry-breaking, Wnt/ $\beta$ -Catenin, Nodal/TGF $\beta$ , embryonic organoids

## 1 Introduction

The emergence of the anteroposterior (AP) axis during the early stages of animal development is a fundamental patterning event that guides the spatial organisation of tissues and organs during embryogenesis. Comparative studies reveal that, although this process differs from one organism to another, in all cases it involves a symmetry-breaking event within a molecular or cellular isotropic system that results in the asymmetric localisation of signalling centres that will drive subsequent patterning events. Dipteran (e.g *Drosophila*) and amniote (e.g chicken and mouse) em-

bryos provide extreme examples of the strategies associated with these processes. In *Drosophila*, the symmetry is broken within a single cell, the oocyte, which acquires both the AP and dorsoventral (DV) axes through well characterised processes of RNA and protein localisation that then serve as references for the rapid patterning of the embryo after fertilisation [1, 2]. On the other hand, in birds and mammals the process occurs in the developing embryo, within a multicellular system and leads to the assignation of fates to cell populations [3–7].

Efforts to understand the mechanisms that pattern early embryos have commonly relied on genetic ap-

\*to whom correspondence is to be addressed: ama11@cam.ac.uk, dat40@cam.ac.uk

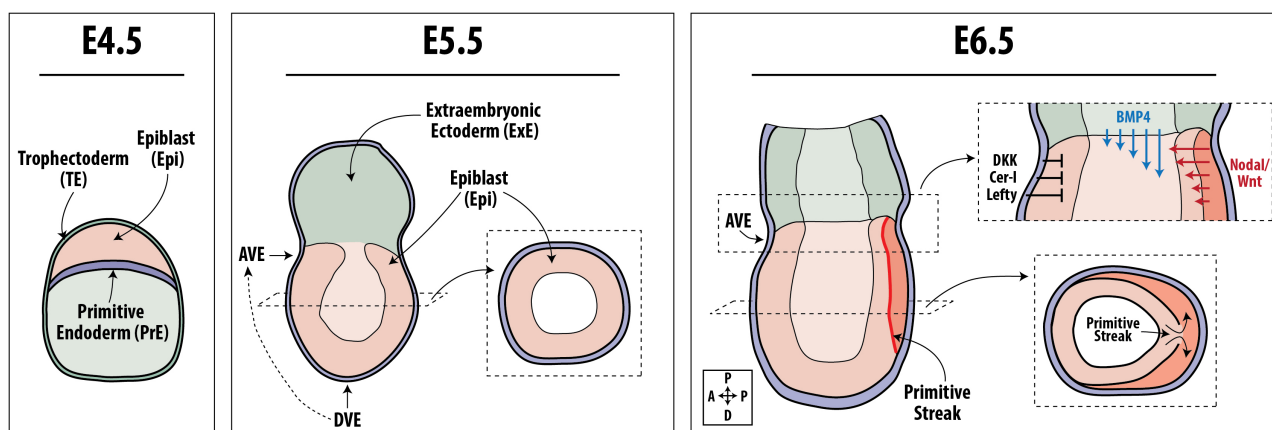

Figure 1: Establishment of the Anteroposterior Axis in the Mouse. At E4.5, following several rounds of cell division and the segregation of the extraembryonic tissues (the Primitive Endoderm (PrE) and the Trophoblast (TE)), the embryo is represented in the blastocyst, a mass of equivalent cells that undergoes a process of epithelialisation. By stage E5.5 the embryo forms a radially symmetric cup-shaped epithelium, the Epiblast (Epi) containing around 300 cells that is attached to the Extra embryonic Ectoderm (ExE) on the proximal side and embedded in another epithelium, the Visceral Endoderm (VE) a derivative of the PrE. At this time, a symmetry-breaking event defines a group of cells within the VE that move to one side and give rise to the Anterior Visceral Endoderm (AVE), a cellular collective that defines the anterior region of the embryo on the adjacent Epi cells and, as a result, establishes the anteroposterior (AP) axis of the embryo. At this stage, the Epi experiences widespread BMP, Nodal and Wnt signalling but the AVE, acting as a source of antagonists of these signalling pathways (*Cerl*, *Lefty1* and *Dkk1*), restricts their effects to the side of the epithelium opposite to the AVE where they induce the localised expression of *T/Bra*, the start of gastrulation by initiation of the Primitive Streak and axial extension at the posterior end. Figure part adapted from [8].

proaches: identification of mutations that disrupt the process and the genes affected in the mutations and, guided by the molecular nature of the protein encoded by those genes, the assignation of molecular events to the process [9, 10]. This approach has been successful but, while it allows some insights into the processes at work, it has limitations. It reveals what is necessary but not what is sufficient, it can conflate correlation and causation, has problems with redundancies and cannot easily probe for the role of mechanical forces, which experiments suggest also play a role in the early events [11, 12]. A complementary approach requires an experimental system that allows a precise and reliable perturbation of the patterning process, the quantitative analysis of the experimental results and, if possible, the exploitation of available genetics. Importantly, such system should mimic the embryo.

We have established a non adherent culture system for mouse Embryonic Stem Cells (ESCs) in which small aggregates of cells undergo symmetry-breaking, polarisation of gene expression and axial development in a reproducible manner that mirrors events in embryos [13–15]. These polarised aggregates, that we call *Gastruloids*, provide a versatile and useful system that, in combination with genetics, fulfils many the requirements for experimental manipulations to study pattern formation in cell ensembles.

Here we use the *Gastruloid* system to study the signalling events that lead to their early patterning: the symmetry-breaking event and the polarised expression of Brachyury (*T/Bra*) that, in the embryo, reflects the establishment of the AP axis and presages the process

of gastrulation. We find that during 24–48h of culture, interactions between Nodal and Wnt signalling promote an intrinsic symmetry-breaking event that is recorded in the expression of *T/Bra*; BMP signalling is not required for these events. These results confirm that *Gastruloids* behave like cells in the epiblast lead us to suggest that a similar spontaneous symmetry-breaking event occurs in the embryo where biases from the extraembryonic tissues, ensure its reproducible location next to the Extraembryonic Ectoderm. We also show that Wnt signalling plays an important role in the amplification and stabilisation of these events.

Our results establish *Gastruloids* as a robust experimental system to analyse mechanisms of fate decisions and pattern formation in mammals and provide some insights about the patterning of embryos, in particular about the role of epithelia and the extraembryonic tissues.

## 2 Materials and Methods

**Cell lines and routine cell culture:** Bra::GFP [16], Nodal<sup>condHBE::YFP</sup> [17], AR8::mCherry (Smad2/3 reporter) [18], IBRE4-TA-Cerulean (BMP reporter) [18] and TCF/LEF::mCherry (TLC2) [19, 20] were cultured in serum supplemented with LIF and foetal bovine serum (ESL medium) on gelatinised tissue-culture flasks and passaged every second day as previously described [14, 19, 21–23]. If cells were not being passaged, half the medium in the tissue culture flask was replaced with ESL. All cell lines were



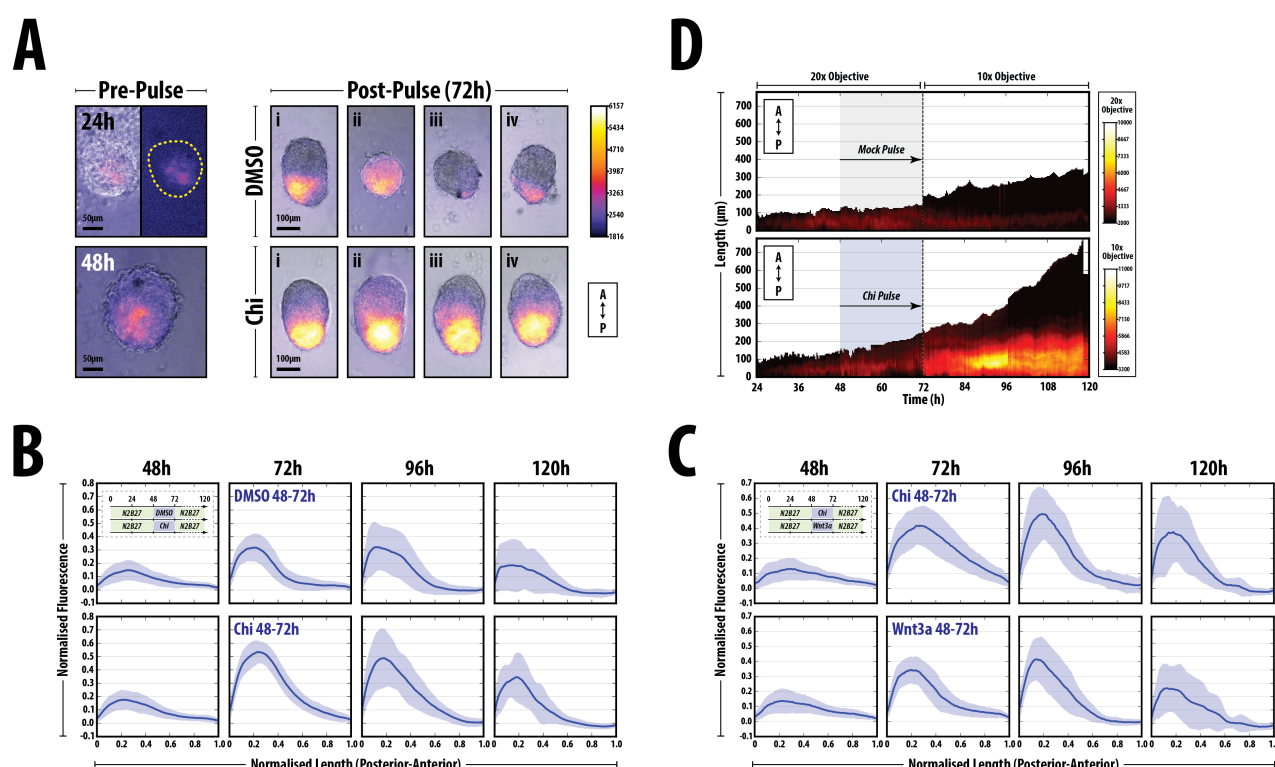

Figure 2: Symmetry-breaking and polarisation in the absence of signalling. *Gastruloids* generated from Bra::GFP were formed and maintained in N2B27 medium for the duration of the experiment and subjected to a 24h pulse of Chi or DMSO between 48 and 72h after aggregation (AA). (A) Morphology and expression of Bra::GFP at 24 and 48h prior to the Chi pulse (left), and examples (i-iv) of *Gastruloids* following either the Chi or DMSO pulse (right). Chi stimulation increases the robustness of the response and reproducibility of the phenotype. Anteroposterior orientation indicated (bottom right). (B) Quantification of Bra::GFP reporter expression in individual *Gastruloids* over time from one replicate experiment. The length of each *Gastruloid* is normalised from 0-1 and the fluorescence is normalised to the maximum fluorescence from the Chi condition. (C) Quantification of Bra::GFP *Gastruloids* following stimulation with either Chi or Wnt3a. (D) Live imaging of one representative *Gastruloid* subjected to a pulse of DMSO (top) or Chir (bottom) between 48 and 72h AA. Shown is the length of the *Gastruloid* over time (posterior = 0μm) and the fluorescence intensity of the reporter (colour). Early time-points (24-72h AA) imaged with a higher power objective. The schematic of the experimental design for *Gastruloid* stimulation is indicated as inserts in (B) and (C).

routinely tested and confirmed free from mycoplasma.

**Immunofluorescence and Microscopy:** *Gastruloids* from the Nodal<sup>condHBE::YFP</sup> [17] cell line were fixed and stained for YFP, Brachyury and Nanog according to the protocol previously described [15]. Hoechst3342 was used to mark the nuclei (see **Supplementary Table 1** for the antibodies used and their dilutions). Confocal z-stacks of *Gastruloids* were generated using an LSM700 (Zeiss) on a Zeiss Axiovert 200 M using a 40 EC Plan-NeoFluar 1.3 NA DIC oil-immersion objective. Hoechst3342, Alexa-488, 568 and 633 were sequentially excited with 405, 488, 555 and 639 nm diode lasers respectively as previously described [23]. Data capture was carried out using Zen2010 v6 (Carl Zeiss Microscopy Ltd, Cambridge UK) and analysis of the average pixel intensities within each nucleus within a given z-plane was performed in Fiji [26]. The z-stacks were acquired of at least 4 *Gastruloids* per condition with a z-interval of 2.11μm for a maximum of 42.2μm.

Widefield, single-time point images of *Gastruloids* were acquired using a Zeiss AxioObserver.Z1 (Carl Zeiss, UK) in a humidified CO<sub>2</sub> incubator (5% CO<sub>2</sub>, 37°C) with a 20x LD Plan-NeoFluar 0.4 NA Ph2 objective with the correction collar set to image through plastic. Illumination was provided by an LED white-light system (Laser2000, Kettering, UK) in combination with filter cubes GFP-1828A-ZHE (Semrock, NY, USA), YFP-2427B-ZHE (Semrock, NY, USA) and Filter Set 45 (Carl Zeiss Microscopy Ltd, Cambridge, UK) used for GFP, YFP and RFP respectively and emitted light recorded using a back-illuminated iXon888 Ultra EMCCD (Andor, UK). Images were analysed using the ImageJ image processing package Fiji [26] and plugins therein as previously described [15]. Briefly, the fluorescence intensity was measured by a line of interest (LOI) drawn from the posterior to anterior region of the *Gastruloid* with the LOI width set to one third the diameter of the *Gastruloid* at 48h (100px with the 20x objective). The background for each position was measured and subtracted from the

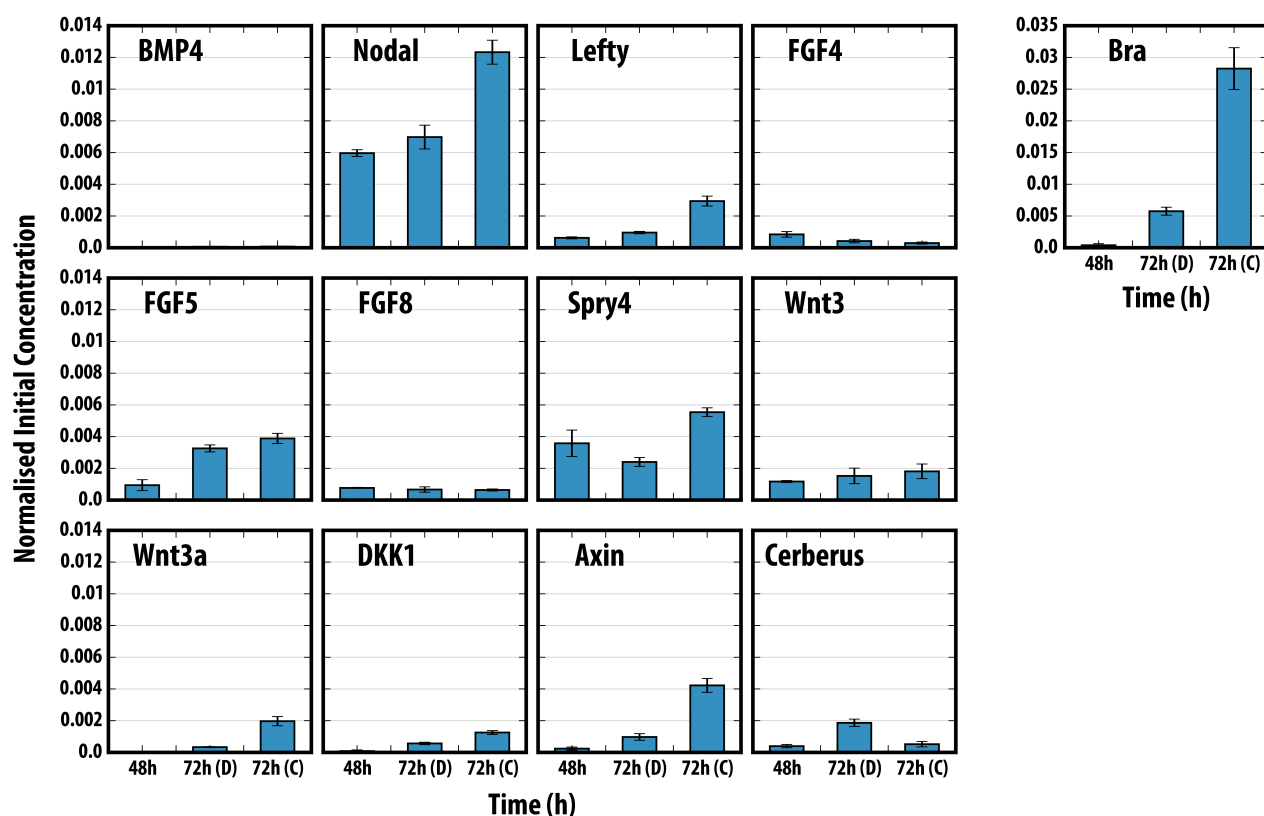

Figure 3: Quantitative PCR analysis of specific genes in early *Gastruloids* development, following a Chi pulse. *Gastruloids* generated from Bra::GFP mouse ESCs were harvested at 48 and 72h with (72h (C)) or without (72h (D)) a Chir pulse prior to RNA extraction and qRT-PCR analysis for the indicated genes (see insert in **Fig. 2B** for schematic representation of the experimental design). Data normalised to the housekeeping gene *Ppia* and is representative of 2 replicate experiments; error bars represent standard deviation of triplicate samples.

fluorescence for each *Gastruloid*. Shape-descriptors were generated by converting brightfield images of *Gastruloids* to binary images and measuring them by particle detection.

For live imaging experiments, each well of a 96-well plate containing individual *Gastruloids* was imaged as described above with images captured every 30 min for a maximum of 96h. All images were analysed in Fiji [26] using the LOI interpolator [27] with the LOI set to a width of 100px.

**Gastruloid culture and application of specific signals:** Aggregates of mouse ESCs were generated as previously described [13, 15]. Briefly, mouse ESCs suspended in 40μl droplets of N2B27 were plated in round-bottomed low-adhesion 96-well plates and left undisturbed for 48h, following which, they were competent to respond to specific signals. The number of cells within each droplet was optimised to ensure that the size of the *Gastruloid* was ~150μm in diameter at 48h; this generally consisted of 400 cells/40μl/well (See **Table S2** for the numbers of cells required for each cell line used in this study). In experiments which required the addition of specific factors to *Gastruloids* on the second day of aggregation (24-48h), 20μl medium was carefully removed with a multichannel pipette, and 20μl of N2B27 containing twice the concentration of

factors was added. This method was preferable to the addition of smaller volumes containing higher concentrations of agonist/antagonists, as the data from these experiments showed more variation between *Gastruloids* (DAT, PB-J, AMA unpublished). Control experiments (e.g. DMSO or N2B27 only) showed that replacement of half the medium at this stage did not significantly alter the ability of *Gastruloids* to respond to signals on the third day. The next day, 150μl fresh N2B27 was added to each of the wells with a multi-channel pipette for 1h to wash the *Gastruloids*; a time delay ensured that sample loss was prevented. Following washing, 150μl N2B27 containing the required factors was then applied. The small molecules used in this study and their concentrations are described in **Table S3**.

**Quantitative RT-PCR** *Gastruloids* ( $n = 64$  per time-point) from Bra::GFP mouse ESCs, subjected to a Chi or DMSO pulse (between 48 and 72h AA), harvested at 48 or 72h AA, trypsinised, pelleted and RNA extracted using the RNeasy Mini kit (Qiagen, 74104) according to the manufacturers instruction as previously described [22]. Samples were normalised to the housekeeping gene *PPIA*. The primers for *BMP4*, *Cerl*, *Chordin*, *DKK*, *FGF4*, *FGF5*, *FGF8*, *Lefty1*, *Nodal*, *Ppia*, *Spry4*, *Wnt3* and *Wnt3a* are described in **Sup-**

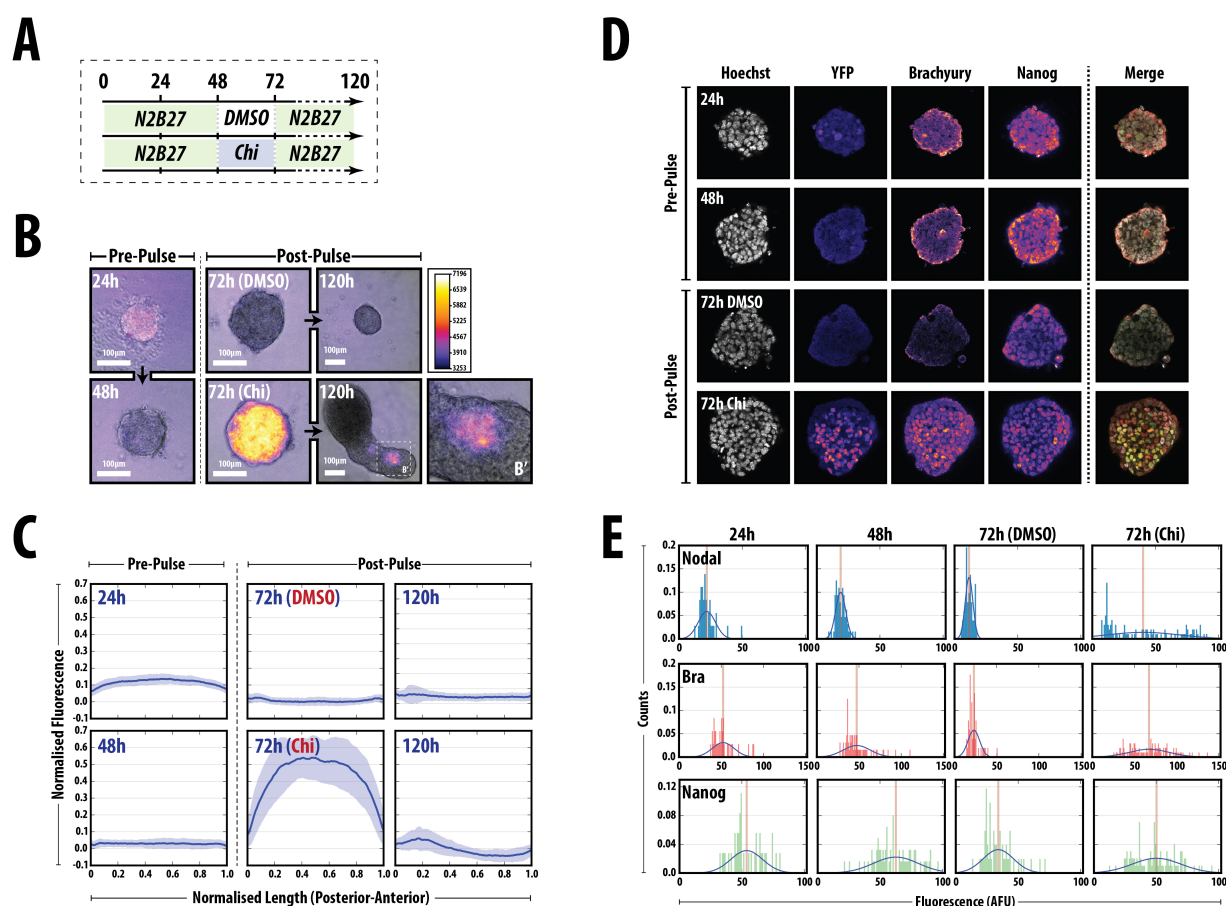

Figure 4: Expression of Nodal during early aggregate formation. (A) Schematic of the experimental design for *Gastruloid* stimulation. (B) *Gastruloids* formed from Nodal<sup>condHBE::YFP</sup> ESCs were imaged by fluorescence microscopy at 24, 48 and 72h after aggregation (AA) and imaged by wide-field fluorescence microscopy. *Gastruloids* were either maintained in N2B27 conditions or stimulated with a pulse of Chi between 48 and 72h AA. (C) Quantitative analysis of the *Gastruloids* at the aforementioned time-points scaling their length between 0 and 1 and normalising their fluorescence to the maximum fluorescence of the Chi pulse at 72h. (D) A single slice through a confocal stack of the Nodal reporter *Gastruloids* stained for YFP, T/Bra and Nanog. (E) Quantification of the images from (D). Notice the increase in Nodal expression after Chi stimulation.

## plemental Table S4.

**Orientation of *Gastruloids*** To define the AP orientation of *Gastruloids*, we have assigned the point of Bra::GFP expression as the 'Posterior', as the primitive streak, which forms in the posterior of embryo, is the site of *T/Bra* expression in the embryo [30–32].

## 3 Results

### 3.1 Summary of the establishment of the anteroposterior axis in the mouse embryo

As a reference for the evaluation and interpretation of our results, a summary of the main events that lead to the establishment of the anteroposterior (AP) axis in the mouse embryo is provided in **Fig. 1**. This process confines the start of gastrulation to a cell population in the proximal posterior edge of the embryo, next to the Extraembryonic Ectoderm, through a sequence of care-

fully choreographed interactions between extraembryonic and embryonic tissues mediated by Nodal, BMP and Wnt signalling. The relationship between these three signals has been established in genetic experiments and places Nodal signalling in the epiblast as the target of the process, with BMP from the TE acting as the driver of both Nodal and Wnt ligands and interactions between these signals and their inhibitors, secreted from the visceral endoderm, being essential for the patterning events [28, 29].

To investigate the mechanisms leading to the initial patterning during development, and to circumvent the difficulties involved in experimentation with embryos at this stage of development, we utilised our non-adherent culture method [13–15]. We have reported before that in this system, small numbers of ESCs upon specific culture treatment will undergo symmetry-breaking and axial elongation. Here we confirm this and, while using a range of ESC lines, we observe that a key parameter of the system is the diameter of the *Gastruloid* at 48h AA (After Aggregation), which ought to be around 155μm +/- 20μm. We notice



that this will occur from slightly different numbers of cells for different lines, always between 400-500 (**Table S2**). After the initial aggregation period, *Gastruloid* cultures were kept individually for 2 days in N2B27 (**Fig. 2A**) and if they were maintained in N2B27 for a further 72h (120h AA), a variety of patterns are observed with a large degree of inter-experimental variation. In general about 50% of individual *Gastruloids* exhibit different degrees of axial elongation and T/Bra::GFP polarisation while the rest is very varied. As reported before, following stimulation by signals such as the Wnt/ $\beta$ -Catenin agonist (Chi) between 48-72h AA, over 85% of the *Gastruloids* undergo axial elongation. Our results suggest that there might be an intrinsic symmetry-breaking event between 24 and 48h AA and that Wnt/ $\beta$ -Catenin signalling plays a role in its stabilisation.

Due to the reproducibility of these structures in culture and the ease with which they can be manipulated by the addition of specific signalling molecules, we were able to utilise this technique to assess how the initial patterning event in the *Gastruloids* is established.

### 3.2 Intrinsic Patterning Events in the *Gastruloids*

To investigate how *Gastruloids* are able to establish their pattern, and the impact that exogenous signalling factors have in this process, we aggregated Bra::GFP ESCs (a cell line has been well characterised in *Gastruloid* formation [13–15]), and imaged their morphology, reporter expression and progression by widefield fluorescence microscopy daily for 72h AA.

*Gastruloids* were maintained in N2B27 for the duration of the experiment, or subjected to either a pulse of the Wnt/ $\beta$ -Catenin agonist CHI99021 (Chi) or vehicle (0.03% DMSO) between 48 and 72h AA. Analysis of *Gastruloids* 24h AA revealed weak, spotty expression of Bra::GFP with a proportion already displaying signs of biased expression towards one pole (**Fig. 2**). The proportion of *Gastruloids* expressing Bra::GFP at this stage did vary between experimental replicates, but in the majority of cases the described expression pattern and phenotype was observed (**Table S5**). By 48h AA in N2B27, the expression levels of Bra::GFP had risen and a more prominent polarisation and regionalisation was observed in the expression domain of the reporter in several *Gastruloids* (**Fig. 2A**). Bra::GFP was observed in one hemisphere of the *Gastruloids*, which tended to show a slight distortion in their shape from spherical to slightly ovoid as previously reported [13]. Addition of Chi at 48h resulted in an increase in the levels of Bra::GFP by 72h AA and increased polarity (**Fig. 2**). Interestingly, DMSO or N2B27 alone has the potential to elicit strong, regionalised expression of the reporters in the same manner as the corresponding Chi stimulation, however the proportion of aggregates showing this expression pattern varies considerably both within and between experimental replicates suggesting that Chi addition modulates the reproducibility and stability of the established pattern

(**Table S5**).

To garner a better understanding of the heterogeneities and the levels of Bra::GFP expression between the *Gastruloids* over time, we quantified the fluorescence in a posterior to anterior direction along the spine of the *Gastruloids* (**Fig. 2B,C**; see Materials and Methods and [15]). In these graphs, the fluorescence is normalised to the maximum levels obtained in following Chi stimulation, and the lengths have been rescaled to fall between 0 and 1 (**Fig. 2B,C**; these representations of the fluorescence will be used throughout this manuscript). As time progresses, the transient nature of Bra::GFP expression can be observed, peaking at 96h AA (**Fig. 2B,C**), and the polarisation (increased expression) of the reporter towards the posterior region (towards '0') can be observed. Compared with the DMSO control, Chi stimulation results in a tighter distribution of the fluorescence traces (the standard deviation indicated by the light blue shading about the mean) and a higher level of fluorescence is reached (**Fig. 2B**). Notice how the expression of the reporter is maintained at the later time-points following Chi. The evolution of the reporter expression over can be observed more clearly through the use of live-cell microscopy to image the *Gastruloids* following a pulse of either DMSO or Chi (**Fig. 2D**). Following Chi stimulation, a flash of Bra::GFP expression is observed at approximately 72h AA (**Fig. 2D**), before being confined to the posterior region and increasing in fluorescence over time.

Stimulation with the endogenous ligand Wnt3a result in a similar fluorescence trace compared with Chi (**Fig. 2C**), however the heterogeneity between individual *Gastruloids* is reduced (**Fig. 2C**).

These data suggest that by 48h AA, the *Gastruloids* have developed an initial patterning, intrinsically driven, prior to the addition of signalling factors and that that increased Wnt/ $\beta$ -Catenin signalling by the addition of Chi increases the reproducibility (both intra- and inter-experimentally) and robustness of the final phenotype and the patterning.

NB: The expression of T/Bra in *Gastruloids* grown in N2B27 is interesting as it contrasts with the observation that this is not frequent in adherent cultures of ESCs. However, single cell analysis during this period does show that some cells express T/Bra mRNA. Furthermore, while low density culture in N2B27 leads to neural tissue, high density culture can lead to the emergence of other cell types [33], suggesting that as cell exit pluripotency they will express mesendoderm promoting factors which are diluted in adherent culture. In the aggregates, these signals can reach threshold levels which in an unpredictable manner can lead to patterning, as shown here.

### 3.3 Gene Expression Analysis of Early Stage *Gastruloids*

The observation that the patterning of the *Gastruloid* can take place in the absence of an external input led us to search for expression of elements of



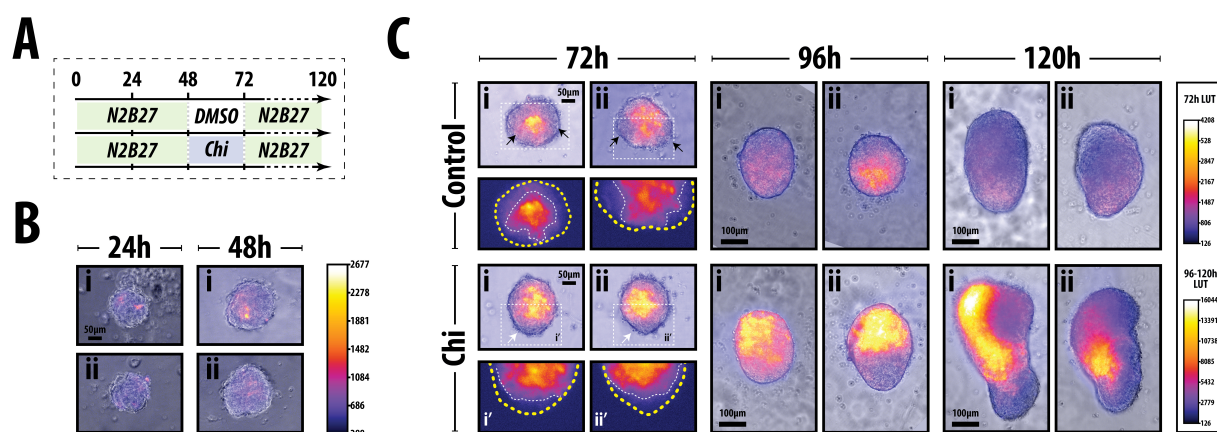

Figure 5: Expression of AR8::mCherry following Wnt/ $\beta$ -Catenin activation. (A) Schematic of the experimental conditions. (B) Expression of the AR8::mCherry reporter after 24 and 48h. (C) Expression of the reporter in two representative *Gastruloids* following either DMSO or Chi at 72, 96 and 120h. Magnified regions (hashed white line) at 72h are shown, indicating regions of the gastruloid that do not express the reporter. The 24h time-point in (B) was taken from a separate experiment with identical imaging conditions as the 48h condition and all time-points in (C). The lookup tables for 24/48h, 72h and 96/120h has been rescaled to aid in the visualisation and localisation of the reporter when expressed at low levels.

the signalling pathways known to participate in the symmetry-breaking in the embryo (**Fig. 1**). At 48h AA, *Gastruloids* express low levels of *FGF4*, *5*, *Axin2*, *Wnt3*, *Nodal* and *Lefty1*, all of which except for *Lefty1* (**Fig. 3**), expressed in the embryonic tissue. However, we detected no expression of genes expressed in extraembryonic tissue: *BMP4*, *Dkk* and *Chordin* with very low expression of *Cerberus* (**Fig. 3**); *Noggin*, an antagonist of BMP signalling, is not expressed in the early stages of development and its absence of expression serves as a baseline for the others (data not shown). This pattern is consolidated in the absence of any external input with increases in expression of *Nodal*, *Lefty1* and *FGF5*, decreases in *FGF4* expression and the emergence, at low levels, of *Wnt3a* at 72h AA. Exposure to Chi during 48 and 72 hrs AA leads to an increase in *Axin2*, *Nodal*, *Lefty*, *Wnt3a* and *Dkk*, all targets of Wnt signalling.

These results confirm that *Gastruloids* resemble the cells in the epiblast and also provide gene expression landmarks to correlate their development with events in embryos e.g *FGF5* is a marker of the E5-E6 epiblast and *Wnt3a* and *Dkk* in the embryo, characterise the onset of gastrulation. Altogether these observations lead us to suggest that *Gastruloids* at 48h AA correspond, approximately, to E5.5 in the embryo and 72h AA to E6.5. Further observations below confirm and extend this correspondence. (**Fig. 3**).

### 3.4 Early Nodal Expression and its correlation with Brachyury and Nanog

The characterisation of the patterning and gene expression of early *Gastruloids* suggests that the Nodal/TGF $\beta$  signalling pathway may be involved in the initial patterning event. To address this further, we generated *Gastruloids* from a Nodal<sup>condHBE::YFP</sup>

transcriptional reporter [17] (hereon referred to as the *Nodal Reporter*) and measured its pattern of expression from the early stages of aggregation (24h) up to 120h AA. In the embryo, the expression of *Nodal* rises in the epiblast and has been shown to be important in the transition from pluripotent to differentiated lineages [17].

At 24h AA, most of the cells within each *Gastruloid* expressed low levels of the reporter heterogeneously, with no evidence of a bias to any particular region and by 48h AA we observed a general down-regulation of the expression of the reporter (**Fig. 4A,B**). Continued culture in N2B27 maintained low reporter expression in the *Gastruloids* (**Fig. 4A,B**), however, following a Chi pulse, a dramatic increase in fluorescence throughout the whole of the *Gastruloid* was observed (**Fig. 4A,B**), that correlated with the expression within the epiblast at E4.5 and 5.5 [17] and with the expression in **Fig. 3**. Between 96 and 120h AA, the Chi-treated aggregates confined the region of expression to the elongating tip and gradually reduced their expression ((**Fig. 4B,B'**). By 120h AA there has been a polarised elongation and we note the emergence of high reporter expression in a group of cells centred at the anterior edge of the elongate; these cells may correspond to an attempt to establish a node as they mimic Nodal expression in the embryo. In support of this, in some instances, we observe low levels of the reporter restricted to one side of the aggregate, much as is the case for Nodal in the embryo (data not shown). Due to this temporal intercell-line variation, it was not prudent to directly compare the expression of Bra::GFP from previous experiments with the expression of the Nodal reporter. Therefore, we sought to directly probe for the expression of Brachyury and Nanog within the Nodal reporter *Gastruloids* to assess a) the correlation between Nodal expression and the

acquisition of a posterior fate and b) to understand the timing of the initial symmetry-breaking event with respect to the loss of pluripotency (Nanog) and initiation of differentiation (Brachyury) with respect to Nodal expression. Nodal reporter *Gastruloids* were fixed and stained for GFP, Brachyury and Nanog, and their expression assessed by confocal microscopy (**Fig. 4C**).

By 24h AA, Nodal was expressed at low levels in a heterogeneous manner, similar to that seen by wide-field microscopy (**Fig. 4C,D**). Nanog was expressed in a heterogeneous manner, with a broad distribution in fluorescence values (**Fig. 4C,D**); there was no detectable above-baseline expression of Brachyury at this stage.

In *Gastruloids* maintained in N2B27 from 48h to 72h, Nodal expression remained low with no increase in the expression of Brachyury and a gradual reduction in the expression of Nanog (**Fig. 4C,D**). This was reflected in the increasing correlation between Nanog, Brachyury and Nanog as their expression gradually reduced to background (**Supplementary Table S6**). Stimulation with Chi from 48-72h increased the fluorescence of Nodal and Brachyury in a heterogeneous manner, and also resulted in a very broad distribution of Nanog, suggesting a commitment to a differentiated state (**Fig. 4C,D**). Assuming the posterior region of the *Gastruloid* is demarcated by the expression of T/Bra, the heterogeneous expression of Nodal in this region bears similarity to that in the embryo at E6.5[17]. Furthermore, there is evidence for expression of Nanog in this region at this time. This suggests that events in the *Gastruloids* mimic events in embryos and that the period around 48-72h is related to the onset of gastrulation. This also confirms our earlier estimate that the period between 48-72h AA is related to the epiblast and we would suggest here that it might encompass the E5.5-E6.5 in the embryo. In these conditions, the expression of Nodal and Brachyury was strongly correlated (**Supplementary Table S6**), however there was very little correlation between Nanog and Nodal.

### 3.5 Nodal and BMP signalling in *Gastruloids*

**Nodal Signalling** To assess whether the expression of Nodal correlated with Nodal signalling in the *Gastruloids*, we used a Smad2/3 (Activin/Nodal signalling) reporter, AR8::mCherry [18]. *Gastruloids* generated from AR8::mCherry mouse ESCs showed expression prior to the addition of Chi (**Fig. 5**). Interestingly, the expression of this reporter was in discrete punctate patterns that vary from *Gastruloid* to *Gastruloid* and that increased, in numbers and intensity, between 24 and 48h AA. Following the addition of Chi, the reporter was up-regulated within the *Gastruloids*. At the end of this period, in many, we observed a crescent free of reporter expression at the future posterior end (**Fig. 5C**). This pattern was also observed in the DMSO treated *Gastruloids* control, but regions of non-expression were more likely to appear in multiple

regions. N2B27 or mock stimulation treatment failed to up-regulate the reporter to the same extent as Chi treated aggregates, indicating that Wnt/ $\beta$ -Catenin signalling was necessary for the enhancement and maintenance of Nodal signalling within one, polar region of the *Gastruloids*.

As time progressed, the *Gastruloids* that elongated following Chi addition showed high reporter expression within the anterior region, and an elongating posterior region that was mostly devoid of reporter expression (**Fig. 5C**). The bulk of this expression is Nodal/Activin dependent as SB431542 (SB43; a selective inhibitor of TGF- $\beta$  superfamily type I Activin receptor-like kinase (ALK) receptors [34]) reduces or eliminates the expression (data not shown). In a small number of *Gastruloids*, this elongating region displayed small punctate regions of expression (data not shown) and by 120h AA we notice that a proportion of the *Gastruloids* exhibited expression on one side from about the mid to forward region. This observation is probably related to the expression of Nodal at this time and supports the possibility that sole *Gastruloids* have the ability to develop a midline and a rudimentary Left Right axis.

**BMP Signalling** In the embryo, genetic experiments have demonstrated the need for BMP signalling from the Extra embryonic regions for the expression and localisation of Nodal and Wnt signalling to the proximal posterior region of the embryo. We have suggested that there is no extraembryonic component in the *Gastruloids*. To test this further, we investigated the activity of BMP signalling using a Smad1,5,7 reporter (IBRE4-TA-Cerulean; hereon known as the BMP signalling reporter) [18] and measured its expression within *Gastruloids* treated either with DMSO or with Chi (48-72h AA) that had either been pre-treated with BMP4 or vehicle (**Fig. 6**). At 24h, prior to any treatment, the levels of fluorescence was not detected in any *Gastruloids* analysed (**Fig. 6B**). By 48h, the reporter was still not up-regulated in control conditions, however, treatment with BMP4 resulted in heterogeneous up-regulation of the reporter (both in levels and between cells) to a modest extent (**Fig. 6C**). As time progressed, vehicle treatment had only a slight effect on the up-regulation of the reporter, and by 120h, the fluorescence had increased from baseline to levels lower than the 48h BMP pre-treated conditions (**Fig. 6C**); from 96-120h however, the low level expression was biased towards one pole of the aggregate. By contrast, expression the reporter was greatly amplified from 96h AA in the BMP4 pre-treated *Gastruloids*, with the majority of the expression located in the 'anterior' region (**Fig. 6C**). By 120h, the expression in the BMP4 pre-treated *Gastruloids* was reduced, yet expression still remained higher within one region (**Fig. 6C**).

These results confirm the absence of BMP4 signalling in the *Gastruloids* and further support the notion that *Gastruloids* are made up of epiblast cells. In addition it also suggest that BMP signalling is not needed for the symmetry-breaking event itself nor the expres-

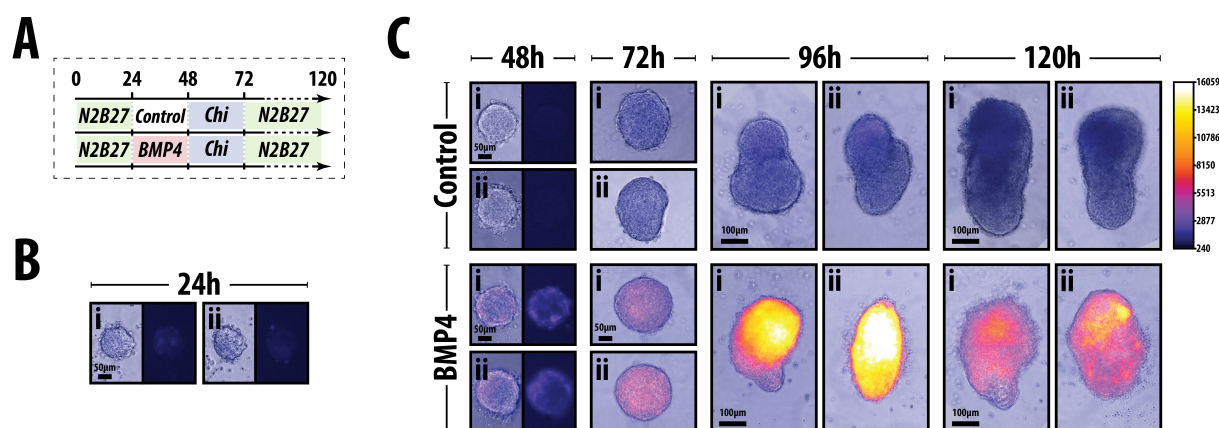

Figure 6: Expression of IBRE4-TA-Cerulean in Chi pulsed *Gastruloids* either pre-treated with vehicle or BMP4 for 24h. (A) Schematic of treatment and conditions. Cont; Control (HCl+0.1%BSA). *Gastruloids* imaged at 24h (B) and 47-120h (C) in the conditions described in (A). By 24h, there is very low BMP signalling. Following BMP pretreatment greatly increases the fluorescence of the reporter. Scalebar indicates 100  $\mu$ m, lookup table displayed in (C) corresponds all images in this figure.

sion of T/Bra (see next section). Whatever low level of BMP signalling exists within the *Gastruloids*, it is not modified by Wnt signalling.

### 3.6 Disruption and augmentation of endogenous signalling during the initial patterning event

The activity of TGF $\beta$ , FGF and Wnt/ $\beta$ -Catenin signalling before the pulse of  $\beta$ -catenin activity as the *Gastruloids* polarise suggests that interactions between these pathways might mediate the symmetry-breaking event. To test this, we used agonists and antagonists of these pathways in the form of small molecules and recombinant proteins, to target Nodal, BMP, FGF and Wnt/ $\beta$ -Catenin signalling on the day before the Chi pulse (Figs. 7A, 8A, 9A). As a read-out of the patterning events, *Gastruloids* were formed from the Bra::GFP and their fluorescence and morphology recorded by widefield microscopy (Figs. 7B, 8B, 9B). It is to be noted that gentle mechanical and volumetric disruptions on the second day (24-48h AA) did not unduly affect the patterning and development of the aggregates (see Materials and Methods; section 2).

In all experiments (Figs. 2A-C, 7B, 8B, 9B) and in agreement with previous observations [13], at 48h AA prior to the Chi pulse, a slight polarisation in the assumed-posterior region of the *Gastruloids* was observed in *Gastruloids* formed from the Bra::GFP cell line which transiently increased in expression over time, peaking at 96h AA (Fig. 7B). Importantly, this pattern of expression is highly reproducible and allows us to use their expression as a landmark for the effect of the treatment on the initial patterning event. Additionally, their reproducibility allows us to use the standard deviation within each experiment as a measure of the effect of the treatment. In the description of the data below, we refer to the treatment before the Chi pulse as *pre-treatment*. For clarity, the results

from the perturbation of the individual pathways will be discussed in turn followed by a summary of the main findings.

**Modification of BMP signalling:** Pre-treatment with BMP4 or the BMP receptor inhibitor DMH1 did not alter the expression levels or localisation of Bra::GFP (Fig. 7B) at 48h AA. However at 72h AA, following the addition of Chi, BMP4 pre-treated aggregates showed Bra::GFP expression at intermediate levels along most of the aggregate with only a subtle augmentation at the posterior region (Fig. 7B) unlike control or DMH1 pre-treatment which showed defined expression/polarisation and a steeper loss of Bra::GFP fluorescence along the *Gastruloids* (Fig. 7B).

By 96h, BMP4 and DMH1 pre-treated Bra::GFP *Gastruloids* were essentially identical to the control experiments showing similar expression levels and regionalisation (Fig. 7B). Whereas BMP4 pre-treatment maintained Bra::GFP expression at the posterior region similar to the controls (although at lower levels than 96h), DMH1 pre-treated *Gastruloids* failed to sustain the expression of Bra::GFP and the expression along the *Gastruloids* returned to levels similar to those expressed at 48h (Fig. 7B). The increase in length of the *Gastruloids* following BMP4 or DMH1 treatment was similar to the control treatment (Figs. 7B).

Using the fluorescence, roundness, area, perimeter and length variables for Principal Component Analysis (PCA) of the *Gastruloids* within each experimental replicate, Bra::GFP *Gastruloids* clustered with respect to their time-point and their trajectories through time were generally reproducible throughout replicate experiments (Figs. 7C). Control experiments showed a progression through time with early time-point *Gastruloids* clustering tightly together (48h AA; red) with the final time-point (120h) being the most disperse. This may reflect heterogeneity between individual *Gastruloids* as they reach the end of their ability to be cul-



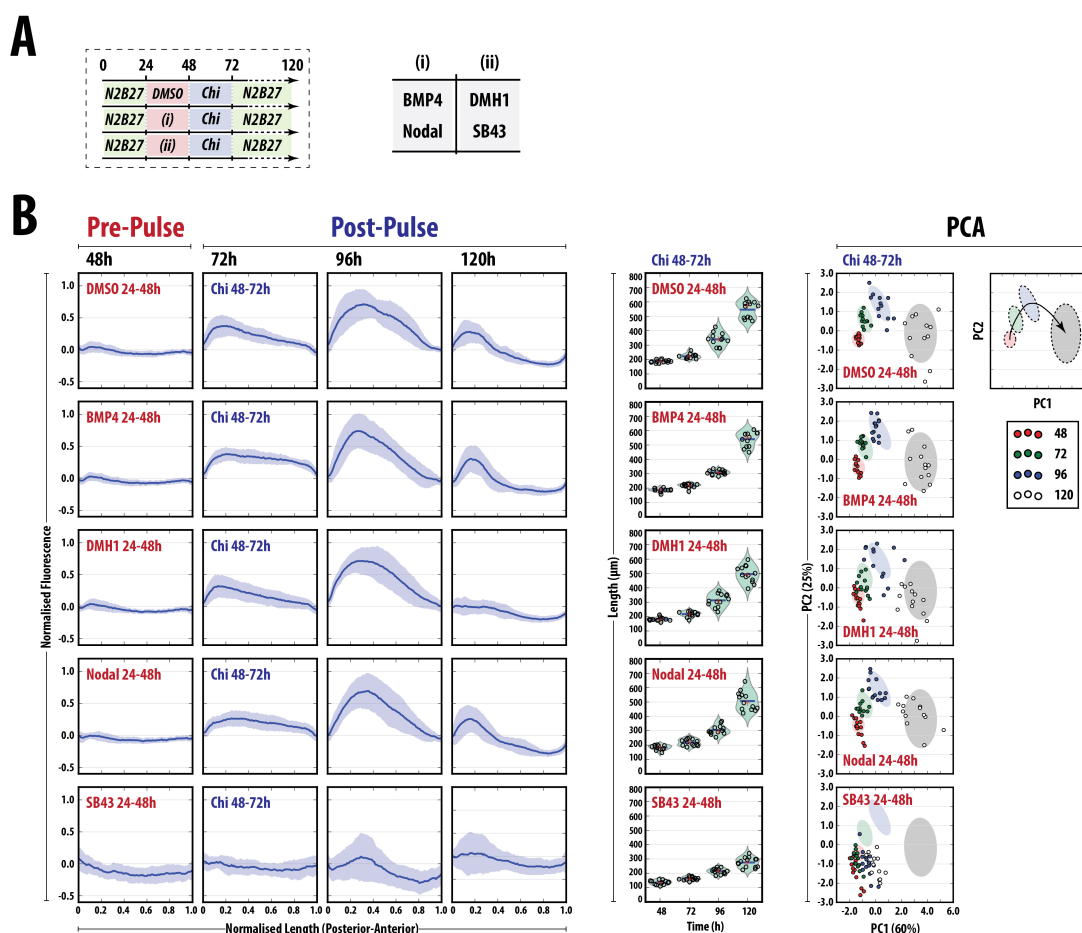

Figure 7: Quantitative analysis of Bra::GFP *Gastruloids* reveals importance of early Nodal signalling for correct patterning. (A) A schematic of the experimental design for *Gastruloid* stimulation. *Gastruloids*, aggregated in N2B27 (green shading) were treated with either DMSO/N2B27 or activators (i) or inhibitors (ii) of the Nodal and BMP signalling pathways shown in the table on the right, for 24h. Following wash-off of these factors (see materials and methods section 2), all *Gastruloids* were treated with a 24h pulse of Chi followed by sustained culture in N2B27. (B) Individual *Gastruloids* treated with DMSO/N2B27 or BMP4, DMH1, Nodal or SB43 were imaged by wide-field fluorescence microscopy and quantitatively analysed for the fluorescence (left panel), length (middle panel), and their Area, circularity, perimeter and roundness. Principal Component Analysis (right) was used to reduce the dimensions of the data, revealing distinct clusters which corresponded to the specific time-points. The indicated percentage for the explained variance is denoted in the axis labels for PC1 and PC2. The fluorescence plots of the left of (B) were normalised to the maximum fluorescence of the DMSO/N2B27 control and for the length of each *Gastruloid* (from 0-1 in both cases).

tured for longer durations due to their increasing mass and propensity to adhere to the bottom of the wells at later times [15]. Whereas BMP4 pre-treatment in the Bra::GFP *Gastruloids* showed a similar PCA distribution pattern to the controls, DMH1 pre-treatment resulted in a less coherent grouping of individual *Gastruloids* as time progressed (Fig. 7C).

These data suggest that BMP signalling is not involved in the early patterning of the *Gastruloids*, although the presence of low levels at these early stages (Fig. 6) may impact the ability to sustain Bra::GFP expression at later time-points.

**Modification of Nodal signalling** Pre-treatment of Bra::GFP *Gastruloids* with Nodal (Fig. 7B) resulted in a similar fluorescence profile over time to that of the controls in terms of the fluorescence expression

profile and the standard deviations between individual *Gastruloids* with no enhancement of the reporter at 48h; a slight variation was observed the control and Nodal pre-treated aggregates in one of the replicates (occurring at the 96h AA, maximum expression point; data not shown). Pre-treatment with ActivinA (data not shown) was essentially identical to the *Gastruloids* in terms of the Bra::GFP fluorescence profile from Nodal pre-treatment, although there was an increase in the standard deviation between individual *Gastruloids* which may indicate subtle differences in the signalling between Nodal and ActivinA (data not shown).

Inhibition of Nodal signalling with SB43 completely abolished the expression of Bra::GFP, with only a small proportion of *Gastruloids* showing any expression at 96-120h AA (Fig. 7B). In addition, the length of Bra::GFP *Gastruloids* was compromised, resulting in



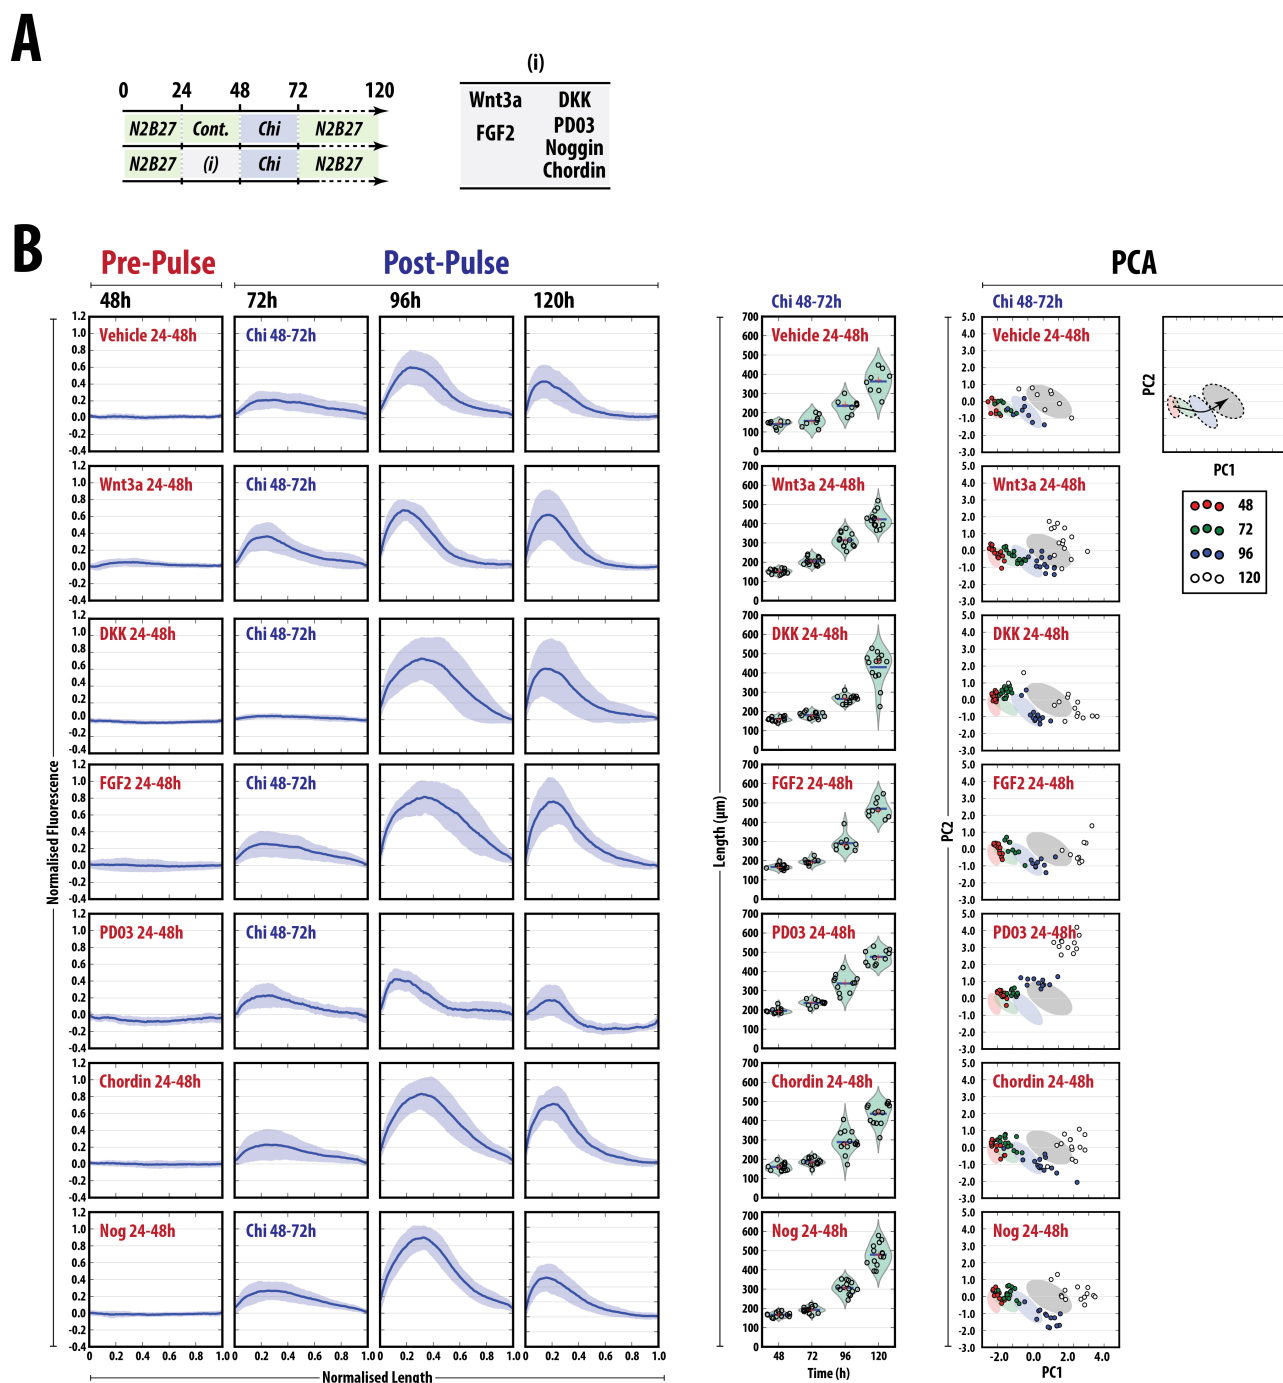

Figure 8: Effect of modulating Wnt, FGF and Nodal/BMP signalling prior to the Chi pulse. (A) Schematic representation of the experimental design (see Fig. 7 legend). (B,C) Individual *Gastruloids* treated as labelled were imaged by wide-field fluorescence microscopy and quantitatively analysed for the fluorescence (left panel), length (middle panel), and their Area, circularity, perimeter and roundness measured (not shown). Principal Component Analysis (right) was used to reduce the dimensions of the data, revealing distinct clusters which corresponded to the specific time-points. The fluorescence plots of the left of (B) and (C) were normalised to the maximum fluorescence of the DMSO/N2B27 control and for the length of each *Gastruloid* (from 0-1 in both cases).

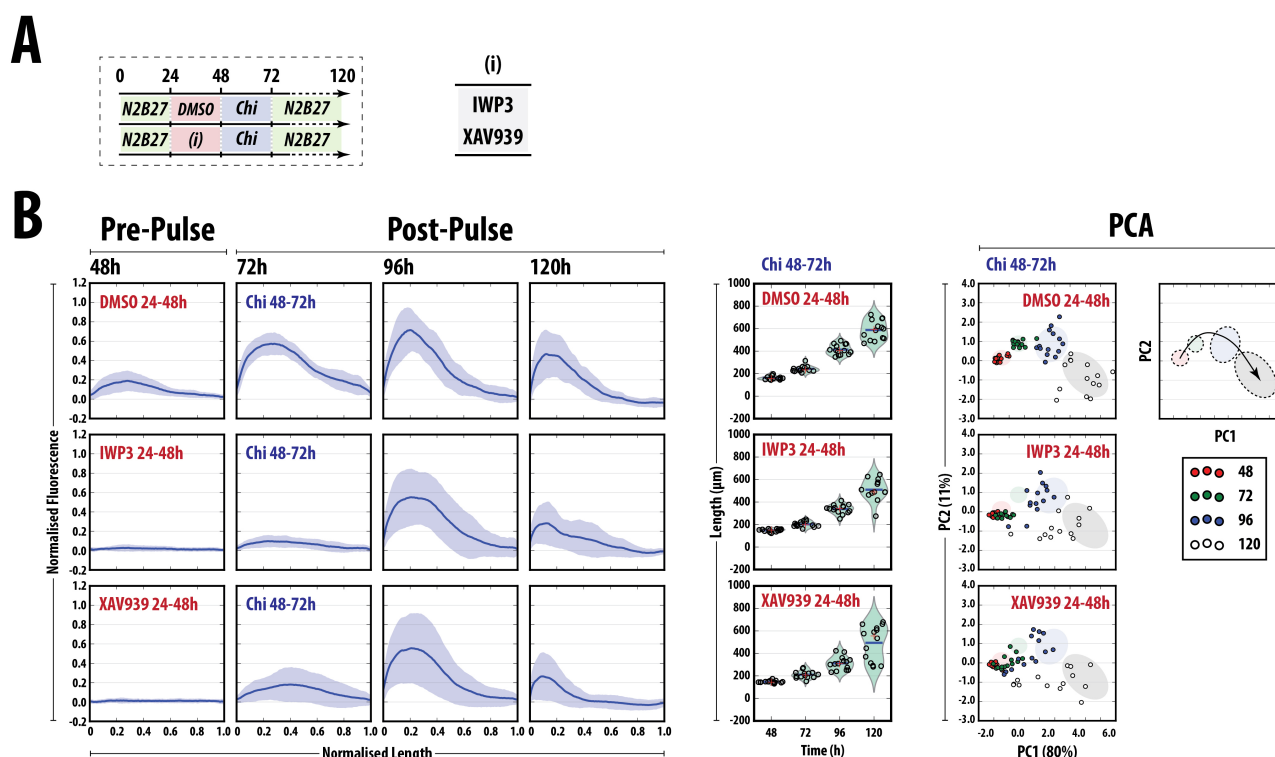

Figure 9: Quantitative analysis of Bra::GFP *Gastruloids* reveals defective pattern formation upon Wnt/ $\beta$ -Catenin disruption between 24 and 48h. (A) A schematic of the experimental design for *Gastruloid* stimulation. *Gastruloids*, aggregated in N2B27 (green shading) were pulsed with either DMSO, the Porcupine inhibitor IWP3 or the Tankyrase inhibitor XAV939 between 24 and 48h AA. Following wash-off of these factors (see materials and methods), all *Gastruloids* were treated with a pulse of Chi (48-72h AA) followed by sustained culture in N2B27. *Gastruloids* were imaged by wide-field fluorescence microscopy and quantitatively analysed for the fluorescence (B, left panel), length (B, middle panel) and their Area, circularity, perimeter and roundness. Principal Component Analysis (B, right panel) revealed that the discrete clusters that corresponded to the time-point in DMSO conditions were heavily disrupted following IWP3 or XAV939 pre-treatment. The fluorescence in (B) was normalised to the maximum fluorescence of the DMSO control. In addition, the length of each *Gastruloid* was rescaled so the maximum length had a value of 1.

a shorter *Gastruloids* following SB43 pre-treatment.

PCA analysis of Bra::GFP *Gastruloids* revealed that Nodal pre-treatment did not have a great effect with the data-points of individual *Gastruloids* remaining in their time-point clusters within the boundaries set by the vehicle control (Fig. 7C). Inhibition of Nodal signaling with SB43 pre-treatment resulted in a complete disruption in the trajectories within the PCA, reflecting the observations with the Fluorescence analysis (Fig. 7B,C).

As the *Gastruloids* show such a distinct phenotype following Nodal inhibition prior to the Chi pulse, it suggests that Nodal signalling is an absolute requirement for in the initial patterning of *Gastruloids*.

**Modification of FGF/MAPK signalling** To assess the role of FGF signalling, we pre-treated *Gastruloids* with either recombinant FGF2 or PD03 (MEK1/2 inhibitor) prior to the Chi pulse (Fig. 8A). Pre-treatment with FGF2 resulted in a Bra::GFP fluorescence profile with slightly increased heterogeneity between individual *Gastruloids* at 48h AA compared with the vehicle control (Fig. 8B). By 72h AA, the expres-

sion of Bra::GFP following FGF2 pre-treatment was essentially identical to the vehicle control, however, at 96h, FGF pre-treatment resulted in a higher maximum fluorescence than the control with the pole of expression less well defined (i.e. the expression was spread over a larger posterior region; Fig. 8B). This increased expression levels of the Bra::GFP reporter was maintained at 120h AA and although the region of expression had become more localised to the posterior region, the expression levels were augmented with respect to the controls (Fig. 8B). Interestingly, although Inhibition of FGF signalling by PD03 pre-treatment had little effect on the expression of Bra::GFP within the *Gastruloids* between 48 and 72h, *Gastruloids* at later time-points (96-120h AA) were severely retarded in their ability to up-regulate the reporter to the same extent as either the control or FGF2 pre-treatment condition (Fig. 8B). In both pre-treatment conditions, the gradual increase in the length of the Bra::GFP *Gastruloids* was not significantly altered over time when compared to the control (Fig. 8B).

Analysis of the *Gastruloids* using PCA revealed FGF2 pre-treatment to be broadly similar to the con-

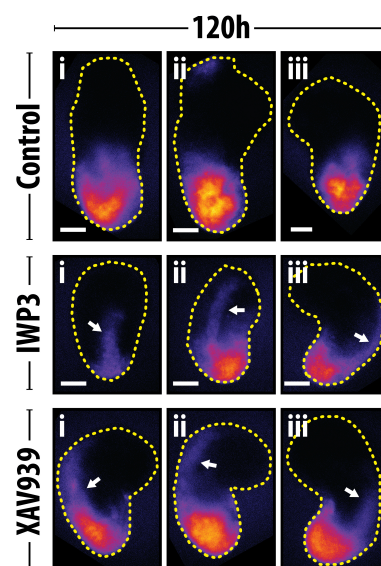

Figure 10: Inhibition of Wnt signalling prior to the Chi pulse results in midline expression in Bra::GFP *Gastruloids*. *Gastruloids* formed from Bra::GFP mouse ESCs were pre-treated with either DMSO (vehicle), IWP3 or XAV939 for 24h before wash-off and stimulation with Chi (see **Fig. 9A** for experimental set up); the 120h AA time-point is indicated. Notice the extended expression of Bra::GFP along the midline of the *Gastruloids* pre-treated with either IWP3 or XAV939 (indicated by white arrows). Three examples for each condition are shown. Scale bar represents 100  $\mu$ m

trols, with discrete clusters corresponding to the time interval following the same trajectory set out by the controls (**Fig. 8B**). However, FGF2 pre-treatment resulted in a more rapid progression, where earlier time-points (e.g. 72h AA) occupied the regions reserved for the 96h time-point (as defined by the controls; **Fig. 8B**). In addition, the heterogeneity between *Gastruloids* was greatly reduced and the clustering appeared tighter than the controls (**Fig. 8B**). Conversely, PD03 pre-treatment greatly disrupted both the usual progression, indicating the requirement of FGF2 for *correct* passage through the plot (**Fig. 8B**).

Taken together, these results indicate that FGF signalling has limited effect on the either initial patterning of the *Gastruloid*, the up-regulation of Bra::GFP fluorescence or progression of the *Gastruloids*, however the low, endogenous levels that are present at these early time-points are essential for constraining the domain of expression at the posterior region and the maintenance of increased expression at later time-points. It may be the case that FGF signalling is acting to lower the threshold of the response.

**Modification of Wnt/ $\beta$ -Catenin signalling** To assess the effect of Wnt/ $\beta$ -Catenin signalling, we pre-treated *Gastruloids* with the recombinant proteins Wnt3a or DKK1, (**Fig. 8**) or small molecule inhibitors (IWP3; to inhibit the secretion of all Wnts [35]; XAV939; to increase  $\beta$ -Catenin degradation through tankyrase inhibition[36]; **Fig. 9**).

Treatment with Wnt3a resulted in a slightly enhanced posterior activation of Bra::GFP at 48h AA compared with the vehicle control (0.1% BSA in PBS) which continued into the 72h time-point (**Fig. 8B**).

As time progressed, the Wnt3a pre-treated *Gastruloids* showed a narrower region of Bra::GFP expression, with the peak expression occurring more posteriorly than the vehicle control, displaying less variation between individual *Gastruloids* (**Fig. 8B**). Although peak Bra::GFP expression occurred at 96h AA following both vehicle and Wnt3a pre-treatment, Wnt3a tended to increase the fluorescence of the reporter to a greater extent than the control (**Fig. 8B**). Interestingly, whereas control *Gastruloids* generally reduced Bra::GFP expression by 120h, Wnt3a pre-treatment maintained the expression, and appeared to confine its expression to a narrower region within the posterior, albeit with a higher standard deviation (**Fig. 8B**).

Inhibition of LRP6-mediated Wnt signalling by pre-treatment with recombinant Dkk1 resulted in an identical expression profile of Bra::GFP to vehicle control at 48h, however following Chi stimulation the fluorescence activation usually observed at 72h AA following vehicle or Wnt3 pre-treatment was abolished in the Dkk1-pre-treated *Gastruloids* (**Fig. 8B**). By 96h, the expression of the reporter had recovered, displaying maximum fluorescence at similar levels to the vehicle and Wnt3a conditions, however, the heterogeneity between individual *Gastruloids* was greatly increased and the polarisation was less defined (i.e. the fluorescence was less concentrated at the posterior region; **Fig. 8B**). After 120h in culture, the fluorescence of Dkk1 pre-treated *Gastruloids* was broadly similar to the Wnt3a pre-treatment with a much higher degree of variation between individual *Gastruloids* than the vehicle control (**Fig. 8B**).

Pre-treatment with either IWP3 or XAV939 delayed the onset and magnitude of Bra::GFP expres-

sion in a similar manner to that of Dkk1 (**Fig. 9B**, left panel). In some replicate experiments in the XAV939-pre-treated *Gastruloids*, the fluorescence expression, although still generally located posterior-wise, displayed a greater degree of variation with respect to the DMSO control (data not shown). Similar to the Dkk1 pre-treated *Gastruloids*, by 96 and 120h AA, the pattern of Bra::GFP fluorescence was broadly similar to the controls although a greater deal of variation was observed between the *Gastruloids* pre-treated with XAV939 and IWP3 and a slightly lower average expression level (**Fig. 9B**, left panel). Interestingly, *Gastruloids* pre-treated with IWP3 (which inhibits all Wnt secretion) was unable to maintain the expression of the reporter at 120h compared with Dkk1 inhibition (inhibits at the level of LRP6), suggesting a requirement for non-canonical Wnts in the maintenance of Bra::GFP fluorescence.

Comparison of the lengths of the *Gastruloids* following either vehicle, Wnt3a or Dkk1 pre-treatment showed no differences in the progression of the average lengths, however Wnt3a pre-treatment reduced the heterogeneity between individual *Gastruloids* whereas Dkk1 pre-treatment resulted in a greater variation at 120h. However, there was a slight disruption in the maximum lengths obtained at 120h AA following IWP3 or XAV939 pre-treatment, with a slightly lower average length and a larger spread of final lengths (**Fig. 9B**, right); this was more pronounced with XAV939 pre-treatment.

PCA analysis of *Gastruloids* pre-treated with Wnt3a and Dkk1 revealed similar trajectories to their control (**Fig. 8B, 9B**). Interestingly, *Gastruloids* pre-treated with Wnt3a from the 72 and 96h time-points were able to explore region usually reserved for the 96h and 120h time-points respectively (**Fig. 8B, 9B**), suggesting that Wnt pre-treatment may enhance the response to Chi. A number of subtle differences between the methods of Wnt inhibition by Dkk1, IWP3 or XAV939 pre-treatment was also revealed by the PCA analysis (**Fig. 8B, 9B**). Whereas pre-treatment with Dkk resulted in a similar trajectory to the control (although with a greater shift in the positive direction in PC1 at 72h AA), the trajectories of IWP3 and XAV939 pre-treated *Gastruloids* was greatly disrupted compared to the controls and the data-points which correspond to specific time intervals were less coherently clustered (**Fig. 9B**). Prior to Chi stimulation, the clustering of the 48h time-point of both IWP3 and XAV939 was dispersed along the PC2 to a greater extent than the control which was unable to be recovered after the Chi pulse (72h). By 96h, IWP3 and XAV939 pre-treated aggregates had largely recovered in terms of their positioning relative to the control, however XAV939 had not fully recovered and data-points corresponding to individual *Gastruloids* were spread throughout PC1, occupying regions reserved for earlier time-points (**Fig. 9B**). After 120h in culture, neither IWP3 or XAV939 pre-treated *Gastruloids* were able to reach the same region of the PCA as the controls; this is reflected in the fluorescence traces which

were unable to maintain Bra::GFP expression to the same extent as the control (**Fig. 9B**). These data suggest that the effects of IWP3 and XAV939 are greater than Dkk1-mediated Wnt inhibition, when many of the variables (length, fluorescence, roundness, area etc.) are taken into account. This further suggests a requirement of 'non-canonical' (i.e.  $\beta$ -Catenin- and LRP6-independent) Wnt signalling at later stages, the secretion of which was inhibited by IWP3.

Upon closer inspection of the expression of the Bra::GFP reporter within the *Gastruloids*, we found that whereas Bra::GFP expression is maintained at the elongating tip of the control *Gastruloid* (as previously described), treatment with IWP3 resulted the expression of the reporter along a mid-line region of a small subset of *Gastruloids* per experimental replicate (**Fig. 10**, indicated by white arrows); this phenotype was less pronounced in XAV939 pre-treatment conditions. Only one *Gastruloid* with Dkk pre-treatment showed this phenotype (data not shown).

**Section summary** Although there was slight variation between replicates (in terms of expression levels and the internal standard deviations), these observations indicate that whereas BMP and FGF signalling has minimal effect at the onset of the initial patterning event, Nodal signalling is absolutely essential to allow the not only the expression of Bra::GFP but possibly its correct placement within the aggregate and Wnt/ $\beta$ -Catenin signalling is required in this early period (24-48h AA) for the correct timing of expression. The requirement of BMP signalling later in the *Gastruloid* development suggests two fundamental stages of *Gastruloid* development: one based on establishing the pattern which is Nodal and Wnt dependent and the second on its growth, and elongation involving a late requirement of both FGF2 and BMP signalling, and 'non-canonical' (e.g. LRP6-independent) Wnt signalling. In addition, these results clearly demonstrate the reproducibility of the *Gastruloid* phenotype not only within experiments but throughout replicate experiments; this measure of both intra- and inter-experimental reproducibility has not to our knowledge been demonstrated other organoid culture techniques [37].

## 4 Discussion

In the mouse, the anteroposterior axis is established early in the cup-shaped zygote through the localisation of Nodal, BMP and Wnt signalling to a proximoposterior region of the embryo that becomes the posterior pole, where gastrulation is initiated as reflected in the expression of T/Bra (**Fig. 1**). Here we have shown that *Gastruloids*, embryonic organoids derived from small aggregates of mouse ESCs, undergo symmetry-breaking and gene expression polarisation in a manner that mirrors events in embryos [13–15, 37]. However, in contrast with embryos that use a sequence of interactions between extraembryonic and embryonic tissues to pattern themselves, *Gastruloids* are com-



posed only of embryonic tissue and reveal an intrinsic capacity for axial organisation that is driven by interactions between Nodal and Wnt signalling. Analysis of signalling reporters in the *Gastruloids* reveals clear Wnt/ $\beta$ -Catenin and Nodal/Smad2/3 activity from 24-48h AA which often becomes localised to one pole of the aggregate and correlates with the onset and localisation of *T/Bra* expression. Furthermore, as in the embryo, this pattern of *T/Bra* expression is dependent on Nodal and Wnt signalling: exposure of *Gastruloids* to inhibitors of these pathways between 24 and 48h AA abolishes or reduces these patterns.

The absence of extraembryonic tissues is reflected in the absence of expression of Trophoectoderm and Visceral Endoderm markers (*BMP4*, *Cerberus* or *Dkk1*) and the absence of BMP reporter activity (Figs. 3, 6). Furthermore, addition of BMP to the culture, has little effect on the patterning process other than a transient increase in the levels of *T/Bra* through alterations of Nodal and Wnt signalling (data not shown). In the embryo, BMP is deployed in the Extraembryonic Ectoderm and regulates the expression of Nodal and Wnt3 in the proximal part of the embryo [38, 39]; a similar effect has been reported in differentiating ESCs [40, 41] and can account for the observed effect BMP on the *Gastruloids*.

The strict dependence of Nodal and Wnt expression on BMP signalling in the embryo and the requirement for their antagonists in the symmetry-breaking event, raise questions about the molecular origin of polarity in our experiments. In the embryo Nodal plays a key role in the establishment of AP polarity [43, 44] and this also appears to be the case in the *Gastruloids* where in the absence of Nodal signalling there is neither localisation of *Bra::GFP* expression nor clear polarisation of the *Gastruloid*. Furthermore, in the embryo successive patterns of *Nodal* expression outline the emergence of the AP axis: it is first expressed throughout the E4.5 blastocyst and the E5.5 epiblast, where it then becomes restricted, first to its proximo-posterior region and shortly afterwards, in a Wnt/ $\beta$ -Catenin signalling dependent manner, to the Primitive Streak [45]. The patterns of *Nodal* expression in the *Gastruloids* are reminiscent of these: an onset of low ubiquitous expression coincident with the extinction of *Nanog* expression, a Wnt/ $\beta$ -Catenin dependent rise between 48 and 72h AA and then a restriction to the elongating region (Fig. 4). These patterns of *Nodal* expression are associated with Smad2/3 activity (Fig. 5). Interestingly, around 96h AA we observe the emergence of a spot of *Nodal* expression at the anterior border of the elongating region which could correspond to a structure similar to the node in the embryo [46, 47]. This possibility is supported by the observation of Smad2/3 reporter activity between 96 and 120h AA on one side of the *Gastruloid* (see Fig. 4, 5); in some instances it is possible to see a similar but faint pattern of *Nodal* expression (data not shown). This pattern of activity is reminiscent of the Left-Right asymmetry expression of *Lefty* and *Nodal* in the embryo [48] and suggests that the *Gastruloids* not only develop an AP axis but

also exhibit bilateral asymmetry.

The self organised patterning of the *Gastruloids* is, at first sight, surprising but might reflect a situation, latent in the embryo, which generates asymmetries in gene expression within the E5.0 Epiblast, before the restriction of primitive streak initiation to the proximal posterior part of the embryo [49, 50]. This possibility is supported by some observations. For example, the epiblast of embryos double mutant for *Cer1* and *Lefty1* is not unpatterned and exhibits a residual asymmetry in *Nodal* expression and, sometimes, double axes [50, 51]; this suggests that the epiblast can pattern itself in the absence of the extraembryonic repressors. Similarly, loss of *Dkk1* and gain of function  $\beta$ -Catenin do not alter the axial organisation of the epiblast, though they eliminate the head [52]. It could be argued that there are functional redundancies in the antagonists of Wnt and Nodal signalling and that this explains the *partial polarity* in *Dkk* and *Cerb/lefty* double mutants. However, this does not account for the observed phenotypes and suggests that these antagonisms are not drivers of AP patterning.

Our results argue for an independent and intrinsic self-patterning ability in the epiblast, and we would like to suggest that the role of the visceral endoderm and the extraembryonic ectoderm (trophoectoderm) is not to break the initial symmetry but to bias and stabilise an intrinsic symmetry-breaking event in the epiblast. Crucially, to position the initiation of gastrulation precisely and reproducibly to one end of the proximal part of the conceptus: near the extraembryonic Ectoderm. The notion that within organisms, intrinsic patterning activities of individual structures are biased and contribute in these complex connected structures has been discussed in other related contexts [37]. The reason for this is likely to lie in the fact that the first cells to leave the Primitive Streak will allocate themselves within the Extraembryonic Ectodermal territory to give rise to the allantois and the chorion [53, 54], and that positioning the initiation of gastrulation to the proximal domain of the embryo facilitates these cells to find their target. A process solely determined by a spontaneous symmetry-breaking event would position this point indiscriminately and therefore not contribute efficiently to the general organisation and structure of the conceptus. Thus, it is possible that the interactions between embryonic and extraembryonic tissues during axial specification are related to the interactions between the embryo and the mother more than between the organism and the embryo.

**Nodal signalling and AP polarity** Our results suggest that symmetry-breaking in *Gastruloids* is reliant on Nodal that is expressed from the moment of aggregation. Nodal is known to play a critical role in the establishment of the AP axis in all vertebrates [55, 56] and, together with its transcriptional target and feedback inhibitor *Lefty1*, has been shown to have an intrinsic symmetry-breaking ability [57–59]. Our results suggest that it is this characteristic that probably mediates the symmetry-breaking in the *Gastru-*

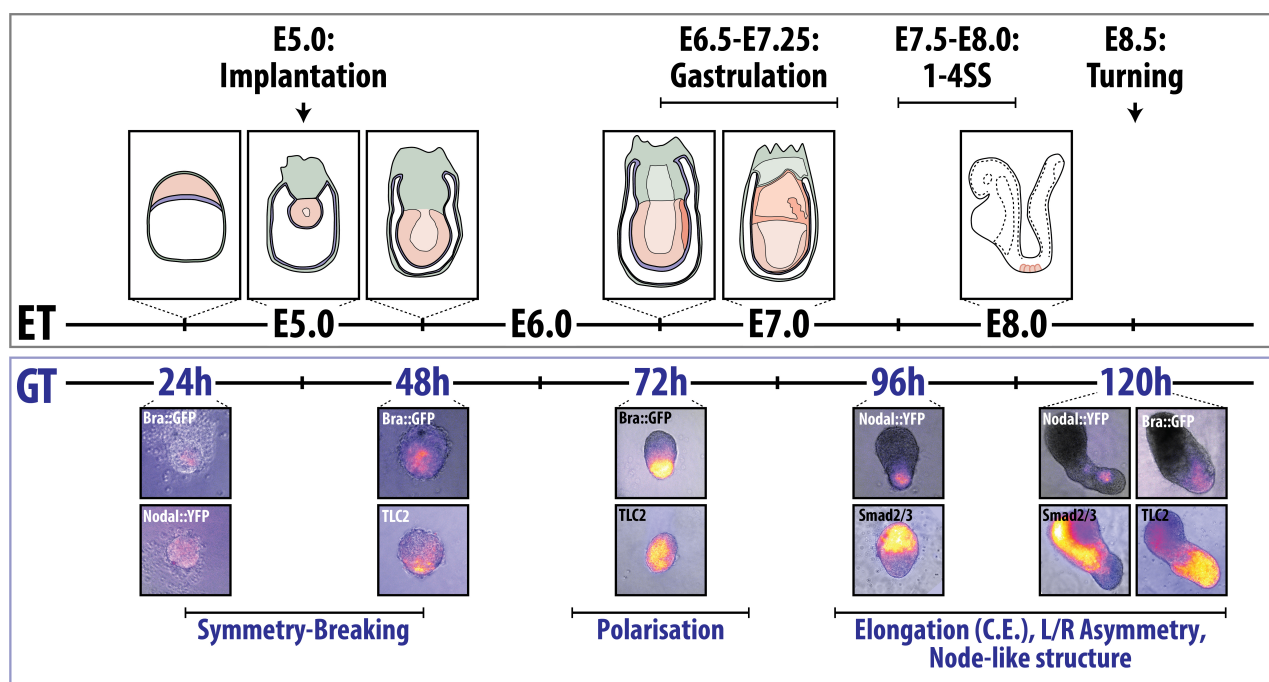

Figure 11: Alignment of the developmental stages of the mouse Embryo and *Gastruloids*. Top panel indicates *Embryo Time* (ET), displaying schematic representations of the mouse embryo with key developmental landmarks. Bottom panel indicates *Gastruloid Time* (GT) with images of *Gastruloids* at indicated time-points expressing the reporter constructs described in this study. Figure part adapted from [8] and the e-Mouse Atlas Project's *Theiler Stages* website resource [42].

*loids*. We observe low levels of Nodal signalling as soon as the aggregate forms and the expression of Nanog, a pluripotency marker, is extinguished. This has been observed in ESCs [60] and might reflect the switch between pluripotency and differentiation. Later, between 24 and 48h AA we detect a range of patterns of the Smad2/3 reporter, with frequent small patches of high levels of activity polarised to one side. We also detect low levels of *Lefty1* expression, which is a target of *Nodal* and its main partner of its self patterning capacity. Furthermore, *Nodal* is a target of Nodal signalling [58] and also has an input from Wnt signalling [61]; this is also recapitulated here where Wnt/ $\beta$ -Catenin signalling does lead to an increase in *Nodal* expression (Fig. 4). At 48h AA, we observe patches of low level Bra::GFP expression and Wnt/ $\beta$ -Catenin signalling. In the absence of any extrinsic signals, this pattern evolves and by 72h AA it is possible to observe Bra::GFP and Wnt/ $\beta$ -Catenin signalling localised to one pole and *Nodal* expression to the elongating region in a variable domain of the initial *Gastruloids*. In the embryo this pattern of expression marks the start of gastrulation at E6.2 and therefore, is consistent with our estimate that 48h AA is about E5.5 as this maps the interval between 48 and 72h AA to approximately between E5.5 and E6.5 (Fig. 11).

In the embryo, expression of Nodal at E5.5 appears heterogeneous (see Fig. 1A in [45]) as it is at 48h AA in our experiments. This pattern and its evolution might represent the development of a Reaction-Diffusion (R-D) system that drives the symmetry-breaking event

both, in the embryo and the *Gastruloid* [57, 58, 62]. The dependence of an intrinsic symmetry-breaking event on Nodal signalling in the embryo is supported by the observation that the patterning defects observed in *Cerberus*, *Lefty* double mutants are corrected by reducing the dosage of Nodal in the mutant embryos [50]. It may be that the interactions between the extraembryonic and embryonic tissues raise the threshold for Nodal activity in the embryo and that this is part of the proximodistal biasing mechanism that we have discussed. The notion that interactions between tissues change the thresholds of signalling events involved in pattern formation in order to positions structures relative to each other might be a principle that emerges from these and related studies [37].

In the embryo, Nodal signalling requires Furin convertase activity which, during E5.0 and E6.0 is provided by the extraembryonic ectoderm [61]. In principle this activity should be missing in the *Gastruloids* but, as they pattern themselves in a Nodal dependent manner and we observe Nodal dependent activity of a Smad2/3 reporter, there must be some residual convertase activity or, as has been suggested, the Nodal precursor is able to signal through Activin receptors [38]. Further work should clarify this.

**The role of Wnt signalling** The establishment of the AP axis in vertebrate embryos is marked by the onset of gastrulation (represented by the primitive streak in amniotes) at the posterior midline. Experiments in *Xenopus* revealed that, in addition to Nodal,

Wnt/ $\beta$ -Catenin signalling plays a key role in this process [63–65], and similar requirement has been revealed in chicken embryos, where the initiation of gastrulation requires a synergy between Nodal and Wnt/ $\beta$ -Catenin signalling [66, 67]. Analysis of mouse mutants for elements of Wnt signalling supports this interaction [7, 8]: while gain of function of Wnt signalling can generate an ectopic axis [68, 69], loss of function leads to defects in polarity and axial extension [70]. Nodal and Wnt signalling synergise in the induction of *T/Bra* expression and the initiation of the primitive streak [66, 67] but, how interactions between these signalling pathways lead to a robust AP axis remains open to discussion. Our experiments provide some insights into the nature of these interactions.

At 48h AA, the patterning of *Gastruloids* appears to be a stochastic event. Whether a *Gastruloid* will elongate or not in the next 48 hours appears to correlate with the localisation of  $\beta$ -Catenin/TCF, Smad2/3 signalling and *T/Bra* expression to one pole of the *Gastruloid*, and varies from experiment to experiment. Surprisingly, exposure to Chi or Wnt3a for 24h between 48 and 72h AA leads to an almost uniform polarisation of both *Bra::GFP* and Wnt signalling as well as elongation with *Bra::GFP* at the tip of the *Gastruloid* across a population (Fig. 2, 7). This observation is surprising as there is no polarised exposure to Chi or Wnt and yet, the response is localised and triggers a precisely spatially orientated event. Furthermore, time-lapse imaging of the behaviour of *Gastruloids* during and after exposure to Chi reveals a transient global response in the form of ubiquitous expression of *Bra::GFP*, which then relaxes to the posterior region of the *Gastruloids*, to where it was before the signalling pulse (Fig. 2D). It seems as if the only region able to respond would be the one that had been already chosen.

There are several examples in which ubiquitous tonic activation of Wnt signalling results in a localised response or, in many instances, is capable of rescuing a Wnt signalling mutants [71–76]. Furthermore, loss of Wnt signalling reduces but does not abolish the expression of genes under its control [70, 77] and in some instances, has no effect on the pattern [78, 79]. One explanation for these observations is that rather than working as a morphogen or directing the output of a gene regulatory network (GRN), Wnt signalling controls the signal to noise ratio of the processes it is associated with [75, 76]. In the case of the *Gastruloids*, this would be the Nodal-driven symmetry-breaking process and its effect on *T/Bra* which is a target of Wnt/ $\beta$ -Catenin signalling (REFS). In support of this, exposure to the Nodal/ALK4/7 signalling inhibitor SB43 during 24–48h AA abolishes the response to Chi and the polarisation of the aggregate. Furthermore, increases in Wnt/ $\beta$ -Catenin, but not Nodal, signalling will rescue losses of Wnt signalling during the same period. This suggests that Nodal is the main driver of the symmetry-breaking event during 24–48h AA and that Wnt/ $\beta$ -Catenin signalling modulates its effects.

Our results support the hypothesis that a key role of Wnt signalling in developmental events is to act as

a filter in cell fate decisions that regulates the ratio of signal to noise of specific processes [75, 76, 80] and suggest that in the *Gastruloids*, the effect of Wnt/ $\beta$ -Catenin signalling is to stabilise the molecular and cellular events that have taken place during 24–48h AA, principally the activity of Nodal/Smad2/3 activity. Interestingly, application of Chi after disrupting Wnt signalling during this period results in a process with much more variability than the wild type situation (Fig. 9). One interpretation of this observation is that, in the absence of Wnt/ $\beta$ -Catenin signalling, the output of Nodal/Smad2/3 activity is noisy and this is what is amplified by Chi between 48 and 72h AA i.e. Wnt/ $\beta$ -Catenin signalling acts as an amplifier/filter of previous events rather than the driver of the symmetry-breaking, which is likely to be Nodal. This situation is supported by the phenotype of Wnt3 mutant embryos which exhibit initial, weak but localised expression of *T/Bra* that then progresses (or not) in a stochastic manner [81, 82].

**Temporal correspondence between events in *Gastruloids* and embryos** The sequence of transcriptional and signalling events that we have described allows us to align the patterning of the *Gastruloids* with that of embryos and refine a previous estimate for the relative timing of events [13]. We surmise that the period between 48 and 72h AA corresponds to E5.5–E6.5 in embryos and serves to anchor our time-line (Fig. 11). This anchorage is corroborated by the patterns of expression of *Nodal*, *FGF4*, *5*, *Wnt3* and *Wnt3a* that mirror the events in the embryo during this time period [83, 84] (Fig. 3). Furthermore, we observe re-expression of *Nanog* in the elongate at 72h AA (Fig. 4E), something that has also been described in the embryo in the nascent mesoderm at the start of Gastrulation [85]. It is in this period that AP polarity is firmly established, *T/Bra* expression becomes restricted to the proximal posterior region and gastrulation begins [82] and we see analogous events in the *Gastruloids* (see also van den Brink *et al.* [13]). The emergence of a node like structure at around 96h makes this time-point equivalent to E7.5 and the emergence of bilaterally asymmetric signalling associated with this structure shortly afterwards buttresses this comparison. Altogether these observations suggest a surprisingly close timing of events and of regulatory interactions between the *Gastruloids* and embryos that is summarised in Fig. 11.

**Symmetry breaking *Gastruloids* and in mouse embryos** Our results show that between 24 and 48h AA, *Gastruloids* undergo a Nodal dependent symmetry-breaking event that, in collaboration with Wnt signalling, leads to the robust polarised expression of *Bra::GFP* to one pole which, by comparison with the embryo, we define as the posterior. We surmise that a similar symmetry-breaking event also occurs in the embryo around E5.5 but exploration of this possibility is constrained by the difficulties of working with em-



bryos at this early stage. However, our system allows detailed analysis of the relationship between the different signalling and transcription factor networks which help enlighten these early stages. The suggested correspondence of events suggests that the period between 24 and 48h AA corresponds to between E4.5 and E5.5 and that this period is important for the establishment of the AP axis. While there is evidence for early engagement of Nodal in this process [43–45, 86], our results suggest an involvement of Wnt signalling in AP axis specification which has not been reported before. For example, inhibition of WNT signalling inhibition of Wnt signalling, e.g. with Porcupine mutants, shows no effect in the patterning of the embryo until the onset of gastrulation [87, 88]. This could be interpreted to suggest that the events that we observe in our system are not informative of the events *in vivo*. However, elements of Wnt signalling are expressed in the embryo from the blastocyst stage [89] and gain and loss of  $\beta$ -Catenin function, as well as of non canonical Wnt signalling, have effects earlier than those of Porcupine mutants (reviews). Furthermore, there are reports of a role for  $\beta$ -Catenin in DV axis formation (refs) and, in the regulation of *T/Bra* expression (refs). Therefore, there might be a Wnt independent  $\beta$ -Catenin signalling event early in development that affects AP axis formation. We suggest that this is the case and that it is these activities that are revealed in our experiments. Our experimental system provides an opportunity to study this further.

Our results also highlight an important role for FGF signalling in the symmetry-breaking events. Inhibition of MEK signalling compromises the patterning of the *Gastruloids* in a manner similar to, but not as extreme as, that resulting from inhibition of Nodal signalling: loss of polarity, elongation and *Bra::GFP* expression. As in the case of Nodal signalling, this defect is not rescuable by *Chi*. On the other hand, exposure to FGF during 24–48h AA increases the domain of *Bra::GFP* expression and interferes, albeit temporarily, with elongation. In the embryo, it is often suggested that FGF signalling is required for the transition from the blastocyst to the epiblast [90–93] but analysis of *FGF4*, 5, 8, and FGF receptor mutants has not revealed any role in axis establishment though there are clear defects associated with mesoderm establishment and axial elongation [94–96]. Furthermore, exposure of early embryos to FGF leads to an expansion of the *Bra::GFP* expression domain [97] as we observe here (Fig. 8) and is consistent with a role in the onset of gastrulation.

As in the case of Wnt signalling, our results suggest a role of FGF signalling in the symmetry-breaking events which might also be operative but difficult to study in the embryo. Our study also shows that FGF/ERK signalling is closely associated with Wnt/ $\beta$ -Catenin signalling in the induction of *T/Bra* expression and therefore in the establishment of the Primitive Streak, and that this might be through modulation of the signalling event or through the target [98]. A related function of FGF in mesoderm induction has been

described in other vertebrates [99, 100] but this is the first clear evidence that this might also be the case in mammals where it is often more closely associated with the transition from pluripotency to differentiation.

### Anteroposterior patterning in *Gastruloids* and embryos

A significant feature of the Wnt/ $\beta$ -Catenin driven patterning of the *Gastruloids* is the absence of proneural gene expression in the anterior domain [13]. When maintained in N2B27 many *Gastruloids* will develop *Sox1*-expressing cells characteristic of neural tissue [13, 14] and this default anterior neural fate is the basis for protocols to generate forebrain and eye cup structures [101–104]. However, after a pulse of Wnt/ $\beta$ -Catenin signalling, *Gastruloids* are able to generate spinal cord-like tissue because they are able to create Neuromesodermal progenitors, the pool that gives rise to this posterior structure and the paraxial mesoderm [14]. This independence of anterior and posterior development reflects the situation in the embryo where both regions are specified through separate mechanisms and, probably, at different times. This can be observed in, for example, loss of *Dkk1* activity or in mutations resulting in a gain of  $\beta$ -Catenin [52, 105, 106] that produce embryos lacking anterior structures, reminiscent of *Gastruloids* after exposure to high levels of Wnt/ $\beta$ -Catenin signalling. It is noteworthy that gain of function constitutive mutations in the Wnt signalling receptor LRP6 or in  $\beta$ -Catenin, although extend the domain of Wnt signalling anteriorly, never cover the whole territory and leave a domain at the anterior most region of the embryo unresponsive [52]. This situation is also very similar to the one *Gastruloids* experience when they are exposed to high levels of Wnt signalling in which there is a transient ubiquitous response but in the anteriormost region the response is not stabilised.

Altogether, these observations suggest that when the AP axis is established the primitive streak specifies mesodermal and endodermal derivatives but that the anterior region of the embryo, that will give rise to the brain, is protected from this fate and delayed in its differentiation. The early suppression of BMP, Nodal and Wnt signalling does not lead to neural fate but rather to a pre-neural state, perhaps simply an epiblast state, protected from becoming primitive streak [107, 108]. This region becomes neural upon the release of antagonists of BMP and Nodal signalling from the prechordal plate and anterior definitive endoderm (ADE) at the end of gastrulation (reviewed in [109]). In a mirror image event, loss of BMP or Nodal signalling leads to embryos with, mostly, anterior neural structures [86, 110]. Failure to generate prechordal plate or the ADE leads to anterior truncations which can be compared to what we observe in our experiments [111, 112].

There is a clear and early subdivision of the aggregate into two domains that will respond differently to signals: Wnt/ $\beta$ -Catenin signalling during 48 and 72h AA stabilises the expression of *T/Bra* in the posterior region but it induces Nodal expression throughout the aggregate and, furthermore, there is a transient ubiqui-



uitous expression of T/Bra as well as of the Wnt/ $\beta$ -Catenin reporter expression that then relaxes to the pre-pulse situation. As transiently there are high levels of Nodal and Wnt/ $\beta$ -Catenin signalling in the anterior domain and there is no expression of T/Bra, this suggests that the symmetry-breaking event not only leads to a posterior like domain that will develop as in the embryo, but also that it generates an anterior domain that is refractory to this signalling event and upon which Wnt acts. The expression of high levels of the Smad2/3 reporter in this region confirm the increase in Nodal as well as highlight how this domain is refractory to T/Bra expression. On the other hand, this domain of Nodal signalling, provide an explanation for why this domain is also refractory to the neural fate as Nodal/Smad2/3 signalling will protect this domain from neural development. This suggests that *Gastruloids* have an anterior domain that is refractory to posterior development. It may be in this primed state and will be timely localised provision of BMP and Nodal inhibitors that releases this potential.

**Conclusions** Our results suggest that the symmetry-breaking event in the mouse embryo results from the self-organising activity of Nodal signalling around E5.0 which is amplified and stabilised at the proximal-posterior region of the embryo by interactions with agonists and antagonists of BMP, Wnt and Nodal itself, between E5.5 and E6.0. These interactions are patterned and lead to localisation of the initiation of gastrulation to a strategic point that allows the first cells that leave the Primitive Streak to invade the Extraembryonic Ectoderm. In the embryo it is likely that the threshold for this raised by the

extraembryonic tissue to ensure the role and outcome of the bias. Probably because of their characteristics, *Gastruloids* reveal and allow the amplification of this event. We have suggested a similar explanation of a related situation in the patterning of the neural tube in ESC-derived cysts [37]; perhaps there is a principle behind this which should be borne in mind in the development of tissues and organs in culture which may follow different paths than in embryos where their development will be constrained by the need to place them relative to other tissues and organs.

Our results show that the symmetry-breaking events in *Gastruloids*, an embryonic organoid system, recapitulate the main events in the embryo. Furthermore, their development closely mirrors that of embryos and allows us to position landmarks for an experimental time-line. Because of the ease of their manipulation, *Gastruloids* represent a good experimental system to explore the mechanisms underlying early developmental events. Here we have used them to reveal novel requirements and interactions for Wnt, Nodal and FGF signalling for symmetry-breaking that are extrapolatable to embryos.

There are other systems in which ESCs can be spatially patterned [113, 114] and each of them can make their own contribution to our understanding of the connection between cell fate assignments and the three dimensional organisation of tissues and organs. The observations that we report here on *Gastruloids*, particularly their ability to be cultured long term and the observation that in addition to an AP axis they can develop an LR asymmetry and generate a node-like structure, suggest that they might be useful beyond the early stages of development.

**Acknowledgements** We thank G. Keller for the Bra::GFP line, A-K Hadjantonakis for the TLC2 reporter and members of the AMA lab for useful discussions and criticisms. This work is funded by a European Research Council (ERC) Advanced Investigator Award to AMA (DAT, PCH) with the contribution of a Project Grant from the Wellcome Trust to AMA, an Engineering and Physical Sciences Research Council (EPSRC) Studentship to PB-J.

# References

- [1] S Roth and J A Lynch. Symmetry Breaking During Drosophila Oogenesis. *Cold Spring Harbor Perspectives in Biology*, 1(2):a001891–a001891, August 2009. doi: 10.1101/cshperspect.a001891. URL <http://cshperspectives.cshlp.org/lookup/doi/10.1101/cshperspect.a001891>.
- [2] V Riechmann and A Ephrussi. Axis formation during Drosophila oogenesis. *Current Opinion in Genetics & Development*, 2001. URL <http://www.sciencedirect.com/science/article/pii/S0959437X00002070>.
- [3] Katsuyoshi Takaoka and Hiroshi Hamada. Cell fate decisions and axis determination in the early mouse embryo. *Development*, 139(1):3–14, January 2012. doi: 10.1242/dev.060095. URL <http://eutils.ncbi.nlm.nih.gov/entrez/eutils/eflink.fcgi?dbfrom=pubmed&id=22147950&retmode=ref&cmd=prlinks>.
- [4] Federica Bertocchini and Claudio D Stern. The hypoblast of the chick embryo positions the primitive streak by antagonizing nodal signaling. *Developmental Cell*, 3(5):735–744, November 2002. URL <http://eutils.ncbi.nlm.nih.gov/entrez/eutils/eflink.fcgi?dbfrom=pubmed&id=12431379&retmode=ref&cmd=prlinks>.
- [5] J Rossant and P P L Tam. Blastocyst lineage formation, early embryonic asymmetries and axis patterning in the mouse. *Development*, 136(5):701–713, February 2009. doi: 10.1242/dev.017178. URL <http://dev.biologists.org/cgi/doi/10.1242/dev.017178>.
- [6] Claudio D Stern. Evolution of the mechanisms that establish the embryonic axes. *Current Opinion in Genetics & Development*, 16(4):413–418, August 2006. doi: 10.1016/j.gde.2006.06.005. URL <http://linkinghub.elsevier.com/retrieve/pii/S0959437X06001146>.
- [7] Jaime A Rivera-Pérez and Anna-Katerina Hadjantonakis. The Dynamics of Morphogenesis in the Early Mouse Embryo. *Cold Spring Harbor Perspectives in Biology*, 7(11), November 2015. doi: 10.1101/cshperspect.a015867. URL <http://eutils.ncbi.nlm.nih.gov/entrez/eutils/eflink.fcgi?dbfrom=pubmed&id=24968703&retmode=ref&cmd=prlinks>.
- [8] Silvia Muñoz-Descalzo, Anna-Katerina Hadjantonakis, and Alfonso Martinez Arias. Wnt/ $\beta$ -catenin signalling and the dynamics of fate decisions in early mouse embryos and embryonic stem (ES) cells. *Semin Cell Dev Biol*, August 2015. doi: 10.1016/j.semcdb.2015.08.011. URL <http://eutils.ncbi.nlm.nih.gov/entrez/eutils/eflink.fcgi?dbfrom=pubmed&id=26321498&retmode=ref&cmd=prlinks>.
- [9] Daniel St Johnston. THE ART AND DESIGN OF GENETIC SCREENS: DROSOPHILA MELANOGASTER. *Nat Rev Genet*, 3(3):176–188, March 2002. doi: 10.1038/nrg751. URL <http://www.nature.com/doifinder/10.1038/nrg751>.
- [10] Kathryn V Anderson. Finding the genes that direct mammalian development. *Trends in Genetics*, 16(3): 99–102, March 2000. doi: 10.1016/S0168-9525(99)01921-6. URL <http://linkinghub.elsevier.com/retrieve/pii/S0168952599019216>.
- [11] Hiroshi Hamada. Role of physical forces in embryonic development. *Semin Cell Dev Biol*, 47-48:88–91, December 2015. doi: 10.1016/j.semcdb.2015.10.011. URL <http://linkinghub.elsevier.com/retrieve/pii/S1084952115002086>.
- [12] R Hiramatsu, T Matsuoka, C Kimura-Yoshida, and S W Han. External Mechanical Cues Trigger the Establishment of the Anterior-Posterior Axis in Early Mouse Embryos. *Developmental Cell*, 2013. URL <http://www.sciencedirect.com/science/article/pii/S1534580713005741>.
- [13] Susanne C van den Brink, Peter Baillie-Johnson, Tina Balayo, Anna-Katerina Hadjantonakis, Sonja Nowotschin, David A Turner, and Alfonso Martinez Arias. Symmetry breaking, germ layer specification and axial organisation in aggregates of mouse embryonic stem cells. *Development*, 141(22):4231–4242, November 2014. doi: 10.1242/dev.113001. URL <http://eutils.ncbi.nlm.nih.gov/entrez/eutils/eflink.fcgi?dbfrom=pubmed&id=25371360&retmode=ref&cmd=prlinks>.
- [14] David A Turner, Penelope C Hayward, Peter Baillie-Johnson, Pau Rué, Rebecca Broome, Fernando Faunes, and Alfonso Martinez Arias. Wnt/ $\beta$ -catenin and FGF signalling direct the specification and maintenance of a neuromesodermal axial progenitor in ensembles of mouse embryonic stem cells. *Development*, 141(22):4243–4253, November 2014. doi: 10.1242/dev.112979. URL <http://eutils.ncbi.nlm.nih.gov/entrez/eutils/eflink.fcgi?dbfrom=pubmed&id=25371361&retmode=ref&cmd=prlinks>.

- [15] Peter Baillie-Johnson, Susanne van den Brink, Tina Balayo, David Andrew Turner, and Alfonso Martinez Arias. Generation of Aggregates of Mouse Embryonic Stem Cells that Show Symmetry Breaking, Polarization and Emergent Collective Behaviour in vitro . *Journal of Visualised Experiments*, 105: e53252, December 2015. doi: 10.3791/53252. URL [http://www.editorialmanager.com/jove/auth\\_RevisionsNeedingApproval.asp?currentPage=1](http://www.editorialmanager.com/jove/auth_RevisionsNeedingApproval.asp?currentPage=1).
- [16] Hans Jörg Fehling, Georges Lacaud, Atsushi Kubo, Marion Kennedy, Scott Robertson, Gordon Keller, and Valerie Kouskoff. Tracking mesoderm induction and its specification to the heman-gioblast during embryonic stem cell differentiation. *Development*, 130(17):4217–4227, September 2003. URL <http://eutils.ncbi.nlm.nih.gov/entrez/eutils/elink.fcgi?dbfrom=pubmed&id=12874139&retmode=ref&cmd=prlinks>.
- [17] Costis Papanayotou, Ataallah Benhaddou, Anne Camus, Aitana Perea-Gomez, Alice Jouneau, Valérie Mezger, Francina Langa, Sascha Ott, Délara Sabéran-Djoneidi, and Jérôme Collignon. A novel nodal enhancer dependent on pluripotency factors and smad2/3 signaling conditions a regulatory switch during epiblast maturation. *Plos Biol*, 12(6):e1001890, June 2014. doi: 10.1371/journal.pbio.1001890. URL <http://eutils.ncbi.nlm.nih.gov/entrez/eutils/elink.fcgi?dbfrom=pubmed&id=24960041&retmode=ref&cmd=prlinks>.
- [18] Palle Serup, Carsten Gustavsen, Tino Klein, Leah A Potter, Robert Lin, Nandita Mullapudi, Ewa Wandzioch, Angela Hines, Ashley Davis, Christine Bruun, Nina Engberg, Dorthe R Petersen, Janny M L Peterslund, Raymond J MacDonald, Anne Grapin-Botton, Mark A Magnuson, and Kenneth S Zaret. Partial promoter substitutions generating transcriptional sentinels of diverse signaling pathways in embryonic stem cells and mice. *Dis Model Mech*, 5(6):956–966, November 2012. doi: 10.1242/dmm.009696. URL <http://eutils.ncbi.nlm.nih.gov/entrez/eutils/elink.fcgi?dbfrom=pubmed&id=22888097&retmode=ref&cmd=prlinks>.
- [19] Fernando Faunes, Penelope Hayward, Silvia Muñoz Descalzo, Sujash S Chatterjee, Tina Balayo, Jamie Trott, Andrew Christoforou, Anna Ferrer-Vaquer, Anna-Katerina Hadjantonakis, Ramanuj Dasgupta, and Alfonso Martinez Arias. A membrane-associated  $\beta$ -catenin/Oct4 complex correlates with ground-state pluripotency in mouse embryonic stem cells. *Development*, 140(6):1171–1183, March 2013. doi: 10.1242/dev.085654. URL <http://eutils.ncbi.nlm.nih.gov/entrez/eutils/elink.fcgi?dbfrom=pubmed&id=23444350&retmode=ref&cmd=prlinks>.
- [20] Anna Ferrer-Vaquer, Anna Piliszek, Guangnan Tian, Robert J Aho, Daniel Dufort, and Anna-Katerina Hadjantonakis. A sensitive and bright single-cell resolution live imaging reporter of Wnt/ $\beta$ -catenin signaling in the mouse. *BMC Dev Biol*, 10(1):121, 2010. doi: 10.1186/1471-213X-10-121. URL <http://www.biomedcentral.com/1471-213X/10/121>.
- [21] Tibor Kalmar, Chea Lim, Penelope Hayward, Silvia Muñoz-Descalzo, Jennifer Nichols, Jordi Garcia-Ojalvo, and Alfonso Martinez Arias. Regulated Fluctuations in Nanog Expression Mediate Cell Fate Decisions in Embryonic Stem Cells. *Plos Biol*, 7(7):e1000149, July 2009. doi: 10.1371/journal.pbio.1000149.g008. URL <http://dx.plos.org/10.1371/journal.pbio.1000149.g008>.
- [22] David A Turner, Jamie Trott, Penelope Hayward, Pau Rué, and Alfonso Martinez Arias. An interplay between extracellular signalling and the dynamics of the exit from pluripotency drives cell fate decisions in mouse ES cells. *Biology Open*, 3(7):614–626, July 2014. doi: 10.1242/bio.20148409. URL <http://bio.biologists.org/content/early/2014/06/13/bio.20148409.full.pdf+html>.
- [23] David A Turner, Pau Rué, Jonathan P Mackenzie, Eleanor Davies, and Alfonso Martinez Arias. Brachyury cooperates with Wnt/ $\beta$ -Catenin signalling to elicit Primitive Streak like behaviour in differentiating mouse ES cells. *BMC Biology*, 12(1):63, August 2014. doi: 10.1186/s12915-014-0063-7. URL <http://eutils.ncbi.nlm.nih.gov/entrez/eutils/elink.fcgi?dbfrom=pubmed&id=25115237&retmode=ref&cmd=prlinks>.
- [24] William C Skarnes, Barry Rosen, Anthony P West, Manousos Koutsourakis, Wendy Bushell, Vivek Iyer, Alejandro O Mujica, Mark Thomas, Jennifer Harrow, Tony Cox, David Jackson, Jessica Severin, Patrick Biggs, Jun Fu, Michael Nefedov, Pieter J de Jong, A Francis Stewart, and Allan Bradley. A conditional knockout resource for the genome-wide study of mouse gene function. *Nature*, 474(7351):337–342, June 2011. doi: 10.1038/nature10163. URL <http://eutils.ncbi.nlm.nih.gov/entrez/eutils/elink.fcgi?dbfrom=pubmed&id=21677750&retmode=ref&cmd=prlinks>.
- [25] Christian Schröter, Pau Rué, Jonathan Peter Mackenzie, and Alfonso Martinez Arias. FGF/MAPK signaling sets the switching threshold of a bistable circuit controlling cell fate decisions in embryonic stem cells.

- Development*, 142(24):4205–4216, December 2015. doi: 10.1242/dev.127530. URL <http://eutils.ncbi.nlm.nih.gov/entrez/eutils/eflink.fcgi?dbfrom=pubmed&id=26511924&retmode=ref&cmd=prlinks>.
- [26] Johannes Schindelin, Ignacio Arganda-Carreras, Erwin Frise, Verena Kaynig, Mark Longair, Tobias Pietzsch, Stephan Preibisch, Curtis Rueden, Stephan Saalfeld, and Benjamin Schmid. Fiji: an open-source platform for biological-image analysis. *Nature Methods*, 9(7):676–682, 2012. doi: 10.1038/nmeth.2019. URL [http://www.nature.com/nmeth/journal/v9/n7/full/nmeth.2019.html%3FWT.ec\\_id%3DNMETH-201207](http://www.nature.com/nmeth/journal/v9/n7/full/nmeth.2019.html%3FWT.ec_id%3DNMETH-201207).
- [27] Daniele Soroldoni, David J Jörg, Luis G Morelli, David L Richmond, Johannes Schindelin, Frank Jülicher, and Andrew C Oates. Genetic oscillations. A Doppler effect in embryonic pattern formation. *Science*, 345(6193):222–225, July 2014. doi: 10.1126/science.1253089. URL <http://eutils.ncbi.nlm.nih.gov/entrez/eutils/eflink.fcgi?dbfrom=pubmed&id=25013078&retmode=ref&cmd=prlinks>.
- [28] P P Tam and R R Behringer. Mouse gastrulation: the formation of a mammalian body plan. *Mech. Dev.*, 68(1-2):3–25, November 1997. URL <http://eutils.ncbi.nlm.nih.gov/entrez/eutils/eflink.fcgi?dbfrom=pubmed&id=9431800&retmode=ref&cmd=prlinks>.
- [29] Patrick P L Tam and David A F Loebel. Gene function in mouse embryogenesis: get set for gastrulation. *Nat Rev Genet*, 8(5):368–381, March 2007. doi: 10.1038/nrg2084. URL <http://www.nature.com/doifinder/10.1038/nrg2084>.
- [30] David G Wilkinson, Sangita Bhatt, and Bernhard G Herrmann. Expression pattern of the mouse T gene and its role in mesoderm formation. *Nature*, 343(6259):657–659, February 1990. doi: 10.1038/343657a0. URL <http://www.nature.com/doifinder/10.1038/343657a0>.
- [31] B G Herrmann. Expression pattern of the Brachyury gene in whole-mount TWis/TWis mutant embryos. *Development*, 113(3):913–917, November 1991. URL <http://eutils.ncbi.nlm.nih.gov/entrez/eutils/eflink.fcgi?dbfrom=pubmed&id=1821859&retmode=ref&cmd=prlinks>.
- [32] R S Beddington, P Rashbass, and V Wilson. Brachyury - a gene affecting mouse gastrulation and early organogenesis. *Dev. Suppl.*, pages 157–165, 1992. URL <http://eutils.ncbi.nlm.nih.gov/entrez/eutils/eflink.fcgi?dbfrom=pubmed&id=1299362&retmode=ref&cmd=prlinks>.
- [33] Jamie Trott and Alfonso Martinez Arias. Single cell lineage analysis of mouse embryonic stem cells at the exit from pluripotency. *Biology Open*, 2(10):1049–1056, 2013. doi: 10.1242/bio.20135934. URL <http://eutils.ncbi.nlm.nih.gov/entrez/eutils/eflink.fcgi?dbfrom=pubmed&id=24167715&retmode=ref&cmd=prlinks>.
- [34] Gareth J Inman, Francisco J Nicolás, James F Callahan, John D Harling, Laramie M Gaster, Alastair D Reith, Nicholas J Laping, and Caroline S Hill. SB-431542 is a potent and specific inhibitor of transforming growth factor-beta superfamily type I activin receptor-like kinase (ALK) receptors ALK4, ALK5, and ALK7. *Mol. Pharmacol.*, 62(1):65–74, July 2002. URL <http://eutils.ncbi.nlm.nih.gov/entrez/eutils/eflink.fcgi?dbfrom=pubmed&id=12065756&retmode=ref&cmd=prlinks>.
- [35] Baozhi Chen, Michael E Dodge, Wei Tang, Jianming Lu, Zhiqiang Ma, Chih-Wei Fan, Shuguang Wei, Wayne Hao, Jessica Kilgore, Noelle S Williams, Michael G Roth, James F Amatruda, Chuo Chen, and Lawrence Lum. Small molecule-mediated disruption of Wnt-dependent signaling in tissue regeneration and cancer. *Nat Chem Biol*, 5(2):100–107, January 2009. doi: 10.1038/nchembio.137. URL <http://www.nature.com/doifinder/10.1038/nchembio.137>.
- [36] Shih-Min A Huang, Yuji M Mishina, Shanming Liu, Atwood Cheung, Frank Stegmeier, Gregory A Michaud, Olga Charlat, Elizabeth Wiellette, Yue Zhang, Stephanie Wiessner, Marc Hild, Xiaoying Shi, Christopher J Wilson, Craig Mckanin, Vic Myer, Aleem Fazal, Ronald Tomlinson, Fabrizio Serluca, Wenlin Shao, Hong Cheng, Michael Shultz, Christina Rau, Markus Schirle, Judith Schlegl, Sonja Ghidelli, Stephen Fawell, Chris Lu, Daniel Curtis, Marc W Kirschner, Christoph Lengauer, Peter M Finan, John A Tallarico, Tewis Bouwmeester, Jeffery A Porter, Andreas Bauer, and Feng Cong. Tankyrase inhibition stabilizes axin and antagonizes Wnt signalling. *Nature*, 461(7264):614–620, October 2009. doi: 10.1038/nature08356. URL <http://eutils.ncbi.nlm.nih.gov/entrez/eutils/eflink.fcgi?dbfrom=pubmed&id=19759537&retmode=ref&cmd=prlinks>.
- [37] David A Turner, Peter Baillie-Johnson, and Alfonso Martinez Arias. Organoids and the genetically encoded self-assembly of embryonic stem cells. *Bioessays*, 38(2):181–191, February 2016. doi: 10.1002/bies.201500111. URL <http://eutils.ncbi.nlm.nih.gov/entrez/eutils/eflink.fcgi?dbfrom=pubmed&id=26666846&retmode=ref&cmd=prlinks>.



- [38] Nadav Ben-Haim, Cindy Lu, Marcela Guzman-Ayala, Luca Pescatore, Daniel Mesnard, Mirko Bischofberger, Felix Naef, Elizabeth J Robertson, and Daniel B Constam. The nodal precursor acting via activin receptors induces mesoderm by maintaining a source of its convertases and BMP4. *Developmental Cell*, 11(3):313–323, September 2006. doi: 10.1016/j.devcel.2006.07.005. URL <http://eutils.ncbi.nlm.nih.gov/entrez/eutils/efetch.fcgi?dbfrom=pubmed&id=16950123&retmode=ref&cmd=prlinks>.
- [39] G Winnier, M Blessing, P A Labosky, and B L Hogan. Bone morphogenetic protein-4 is required for mesoderm formation and patterning in the mouse. *Genes & Development*, 9(17):2105–2116, September 1995. URL <http://eutils.ncbi.nlm.nih.gov/entrez/eutils/efetch.fcgi?dbfrom=pubmed&id=7657163&retmode=ref&cmd=prlinks>.
- [40] Mattias Hansson, Dorthe R Olesen, Janny M L Peterslund, Nina Engberg, Morten Kahn, Maria Winzi, Tino Klein, Poul Maddox-Hyttel, and Palle Serup. A late requirement for Wnt and FGF signaling during activin-induced formation of foregut endoderm from mouse embryonic stem cells. *Developmental Biology*, 330(2):286–304, June 2009. doi: 10.1016/j.ydbio.2009.03.026. URL <http://eutils.ncbi.nlm.nih.gov/entrez/eutils/efetch.fcgi?dbfrom=pubmed&id=19358838&retmode=ref&cmd=prlinks>.
- [41] Steven A Jackson, Jacqueline Schiesser, Edouard G Stanley, and Andrew G Elefanty. Differentiating Embryonic Stem Cells Pass through ‘Temporal Windows’ That Mark Responsiveness to Exogenous and Paracrine Mesendoderm Inducing Signals. *PLoS ONE*, 5(5):e10706, May 2010. doi: 10.1371/journal.pone.0010706.g007. URL <http://dx.plos.org/10.1371/journal.pone.0010706.g007>.
- [42] Richard Baldock, Jonathan Bard, Duncan Davidson, and Kirstie Lawson. Theiler Stage Definition, May 1998. URL [http://www.emouseatlas.org/emap/ema/theiler\\_stages/StageDefinition/stagedefinition.html](http://www.emouseatlas.org/emap/ema/theiler_stages/StageDefinition/stagedefinition.html).
- [43] J Brennan, C C Lu, D P Norris, T A Rodriguez, R S Beddington, and E J Robertson. Nodal signalling in the epiblast patterns the early mouse embryo. *Nature*, 411(6840):965–969, June 2001. doi: 10.1038/35082103. URL <http://eutils.ncbi.nlm.nih.gov/entrez/eutils/efetch.fcgi?dbfrom=pubmed&id=11418863&retmode=ref&cmd=prlinks>.
- [44] Cindy C Lu and Elizabeth J Robertson. Multiple roles for Nodal in the epiblast of the mouse embryo in the establishment of anterior-posterior patterning. *Developmental Biology*, 273(1):149–159, September 2004. doi: 10.1016/j.ydbio.2004.06.004. URL <http://eutils.ncbi.nlm.nih.gov/entrez/eutils/efetch.fcgi?dbfrom=pubmed&id=15302604&retmode=ref&cmd=prlinks>.
- [45] I Varlet, J Collignon, and E J Robertson. nodal expression in the primitive endoderm is required for specification of the anterior axis during mouse gastrulation. *Development*, 124(5):1033–1044, March 1997. URL <http://eutils.ncbi.nlm.nih.gov/entrez/eutils/efetch.fcgi?dbfrom=pubmed&id=9056778&retmode=ref&cmd=prlinks>.
- [46] L A Lowe, D M Supp, K Sampath, T Yokoyama, C V Wright, S S Potter, P Overbeek, and M R Kuehn. Conserved left-right asymmetry of nodal expression and alterations in murine situs inversus. *Nature*, 381(6578):158–161, May 1996. doi: 10.1038/381158a0. URL <http://eutils.ncbi.nlm.nih.gov/entrez/eutils/efetch.fcgi?dbfrom=pubmed&id=8610013&retmode=ref&cmd=prlinks>.
- [47] J Collignon, I Varlet, and E J Robertson. Relationship between asymmetric nodal expression and the direction of embryonic turning. *Nature*, 381(6578):155–158, May 1996. doi: 10.1038/381155a0. URL <http://eutils.ncbi.nlm.nih.gov/entrez/eutils/efetch.fcgi?dbfrom=pubmed&id=8610012&retmode=ref&cmd=prlinks>.
- [48] C Meno, A Shimono, Y Saijoh, K Yashiro, K Mochida, S Ohishi, S Noji, H Kondoh, and H Hamada. lefty-1 is required for left-right determination as a regulator of lefty-2 and nodal. *Cell*, 94(3):287–297, August 1998. URL <http://eutils.ncbi.nlm.nih.gov/entrez/eutils/efetch.fcgi?dbfrom=pubmed&id=9708731&retmode=ref&cmd=prlinks>.
- [49] Katsuyoshi Takaoka, Masamichi Yamamoto, Hidetaka Shiratori, Chikara Meno, Janet Rossant, Yukio Saijoh, and Hiroshi Hamada. The mouse embryo autonomously acquires anterior-posterior polarity at implantation. *Developmental Cell*, 10(4):451–459, April 2006. doi: 10.1016/j.devcel.2006.02.017. URL <http://eutils.ncbi.nlm.nih.gov/entrez/eutils/efetch.fcgi?dbfrom=pubmed&id=16580991&retmode=ref&cmd=prlinks>.
- [50] Aitana Perea-Gomez, Francis D J Vella, William Shawlot, Mustapha Oulad-Abdelghani, Claire Chazaud, Chikara Meno, Veronique Pfister, Lan Chen, Elizabeth Robertson, Hiroshi Hamada, Richard R Behringer, and Siew-Lan Ang. Nodal antagonists in the anterior visceral endoderm prevent the formation of multiple

- primitive streaks. *Developmental Cell*, 3(5):745–756, November 2002. URL <http://eutils.ncbi.nlm.nih.gov/entrez/eutils/elink.fcgi?dbfrom=pubmed&id=12431380&retmode=ref&cmd=prlinks>.
- [51] Masamichi Yamamoto, Yukio Saijoh, Aitana Perea-Gomez, William Shawlot, Richard R Behringer, Siew-Lan Ang, Hiroshi Hamada, and Chikara Meno. Nodal antagonists regulate formation of the anteroposterior axis of the mouse embryo. *Nature*, 428(6981):387–392, March 2004. doi: 10.1038/nature02418. URL <http://eutils.ncbi.nlm.nih.gov/entrez/eutils/elink.fcgi?dbfrom=pubmed&id=15004567&retmode=ref&cmd=prlinks>.
- [52] Samara L Lewis, Poh-Lynn Khoo, R Andrea De Young, Kirsten Steiner, Chris Wilcock, Mahua Mukhopadhyay, Heiner Westphal, Robyn V Jamieson, Lorraine Robb, and Patrick P L Tam. Dkk1 and Wnt3 interact to control head morphogenesis in the mouse. *Development*, 135(10):1791–1801, May 2008. doi: 10.1242/dev.018853. URL <http://eutils.ncbi.nlm.nih.gov/entrez/eutils/elink.fcgi?dbfrom=pubmed&id=18403408&retmode=ref&cmd=prlinks>.
- [53] Kimberly E Inman and Karen M Downs. Localization of Brachyury (T) in embryonic and extraembryonic tissues during mouse gastrulation. *Gene Expr. Patterns*, 6(8):783–793, October 2006. doi: 10.1016/j.modgep.2006.01.010. URL <http://eutils.ncbi.nlm.nih.gov/entrez/eutils/elink.fcgi?dbfrom=pubmed&id=16545989&retmode=ref&cmd=prlinks>.
- [54] Karen M Downs, Kimberly E Inman, Dexter X Jin, and Allen C Enders. The Allantoic Core Domain: new insights into development of the murine allantois and its relation to the primitive streak. *Dev. Dyn.*, 238(3):532–553, March 2009. doi: 10.1002/dvdy.21862. URL <http://eutils.ncbi.nlm.nih.gov/entrez/eutils/elink.fcgi?dbfrom=pubmed&id=19191225&retmode=ref&cmd=prlinks>.
- [55] Helen K Chea, Christopher V Wright, and Billie J Swalla. Nodal signaling and the evolution of deuterostome gastrulation. *Dev. Dyn.*, 234(2):269–278, October 2005. doi: 10.1002/dvdy.20549. URL <http://eutils.ncbi.nlm.nih.gov/entrez/eutils/elink.fcgi?dbfrom=pubmed&id=16127715&retmode=ref&cmd=prlinks>.
- [56] Michael M Shen. Nodal signaling: developmental roles and regulation. *Development*, 134(6):1023–1034, March 2007. doi: 10.1242/dev.000166. URL <http://eutils.ncbi.nlm.nih.gov/entrez/eutils/elink.fcgi?dbfrom=pubmed&id=17287255&retmode=ref&cmd=prlinks>.
- [57] Patrick Müller, Katherine W Rogers, Ben M Jordan, Joon S Lee, Drew Robson, Sharad Ramanathan, and Alexander F Schier. Differential diffusivity of Nodal and Lefty underlies a reaction-diffusion patterning system. *Science*, 336(6082):721–724, May 2012. doi: 10.1126/science.1221920. URL <http://eutils.ncbi.nlm.nih.gov/entrez/eutils/elink.fcgi?dbfrom=pubmed&id=22499809&retmode=ref&cmd=prlinks>.
- [58] Tetsuya Nakamura, Naoki Mine, Etsushi Nakaguchi, Atsushi Mochizuki, Masamichi Yamamoto, Kenta Yashiro, Chikara Meno, and Hiroshi Hamada. Generation of robust left-right asymmetry in the mouse embryo requires a self-enhancement and lateral-inhibition system. *Developmental Cell*, 11(4):495–504, October 2006. doi: 10.1016/j.devcel.2006.08.002. URL <http://eutils.ncbi.nlm.nih.gov/entrez/eutils/elink.fcgi?dbfrom=pubmed&id=17011489&retmode=ref&cmd=prlinks>.
- [59] Hou Juan and Hiroshi Hamada. Roles of nodal-lefty regulatory loops in embryonic patterning of vertebrates. *Genes to Cells*, 6(11):923–930, November 2001. doi: 10.1046/j.1365-2443.2001.00481.x. URL <http://doi.wiley.com/10.1046/j.1365-2443.2001.00481.x>.
- [60] Katherine E Galvin-Burgess, Emily D Travis, Kelsey E Pierson, and Jay L Vivian. TGF- $\beta$ -superfamily signaling regulates embryonic stem cell heterogeneity: self-renewal as a dynamic and regulated equilibrium. *Stem Cells*, 31(1):48–58, January 2013. doi: 10.1002/stem.1252. URL <http://eutils.ncbi.nlm.nih.gov/entrez/eutils/elink.fcgi?dbfrom=pubmed&id=23081664&retmode=ref&cmd=prlinks>.
- [61] Séverine Beck, J Ann Le Good, Marcela Guzman, Nadav Ben Haim, Karine Roy, Friedrich Beermann, and Daniel B Constam. Extraembryonic proteases regulate Nodal signalling during gastrulation. *Nature Cell Biology*, 4(12):981–985, November 2002. doi: 10.1038/ncb890. URL <http://www.nature.com/doifinder/10.1038/ncb890>.
- [62] Hiroshi Hamada. In search of Turing in vivo: understanding Nodal and Lefty behavior. *Developmental Cell*, 22(5):911–912, May 2012. doi: 10.1016/j.devcel.2012.05.003. URL <http://eutils.ncbi.nlm.nih.gov/entrez/eutils/elink.fcgi?dbfrom=pubmed&id=22595667&retmode=ref&cmd=prlinks>.
- [63] H. Steinbeisser, E.M. De Robertis, M Ku, D S Kessler, and D A Melton. Xenopus axis formation: induction of goosecoid by injected Xwnt-8 and activin mRNAs. *Development*, 118(2):499–507, June 1993. URL <http://eutils.ncbi.nlm.nih.gov/entrez/eutils/elink.fcgi?dbfrom=pubmed&id=7900991&retmode=ref&cmd=prlinks>.

- [64] T Watabe, S Kim, A Candia, U Rothbächer, C Hashimoto, K Inoue, and K W Cho. Molecular mechanisms of Spemann's organizer formation: conserved growth factor synergy between *Xenopus* and mouse. 1995. URL <http://genesdev.cshlp.org/content/9/24/3038.short>.
- [65] D J Crease, S Dyson, and J B Gurdon. Cooperation between the activin and Wnt pathways in the spatial control of organizer gene expression. *Proceedings of the National Academy of Sciences*, 95(8):4398–4403, April 1998. URL <http://eutils.ncbi.nlm.nih.gov/entrez/eutils/efetch.fcgi?dbfrom=pubmed&id=9539748&retmode=ref&cmd=prlinks>.
- [66] K Joubin and C D Stern. Molecular Interactions Continuously Define the Organizer during the Cell Movements of Gastrulation. *Cell*, 1999. URL <http://www.sciencedirect.com/science/article/pii/S0092867400800446>.
- [67] I Skromne and C D Stern. Interactions between Wnt and Vg1 signalling pathways initiate primitive streak formation in the chick embryo. *Development*, 128(15):2915–2927, August 2001. URL <http://eutils.ncbi.nlm.nih.gov/entrez/eutils/efetch.fcgi?dbfrom=pubmed&id=11532915&retmode=ref&cmd=prlinks>.
- [68] Bradley J Merrill, H Amalia Pasolli, Lisa Polak, Michael Rendl, Maria J García-García, Kathryn V Anderson, and Elaine Fuchs. Tcf3: a transcriptional regulator of axis induction in the early embryo. *Development*, 131(2):263–274, January 2004. doi: 10.1242/dev.00935. URL <http://eutils.ncbi.nlm.nih.gov/entrez/eutils/efetch.fcgi?dbfrom=pubmed&id=14668413&retmode=ref&cmd=prlinks>.
- [69] H Pöpperl, C Schmidt, V Wilson, C R Hume, J Dodd, R Krumlauf, and R S Beddington. Misexpression of Cwnt8C in the mouse induces an ectopic embryonic axis and causes a truncation of the anterior neuroectoderm. *Development*, 124(15):2997–3005, August 1997. URL <http://eutils.ncbi.nlm.nih.gov/entrez/eutils/efetch.fcgi?dbfrom=pubmed&id=9247341&retmode=ref&cmd=prlinks>.
- [70] William C Dunty, Kristin K Biris, Ravindra B Chalamalasetty, Makoto M Taketo, Mark Lewandoski, and Terry P Yamaguchi. Wnt3a/beta-catenin signaling controls posterior body development by coordinating mesoderm formation and segmentation. *Development*, 135(1):85–94, January 2008. doi: 10.1242/dev.009266. URL <http://eutils.ncbi.nlm.nih.gov/entrez/eutils/efetch.fcgi?dbfrom=pubmed&id=18045842&retmode=ref&cmd=prlinks>.
- [71] J Sampedro, P Johnston, and P A Lawrence. A role for wingless in the segmental gradient of *Drosophila*? *Development*, 117(2):677–687, February 1993. URL <http://eutils.ncbi.nlm.nih.gov/entrez/eutils/efetch.fcgi?dbfrom=pubmed&id=8330533&retmode=ref&cmd=prlinks>.
- [72] M K Baylies, Alfonso Martinez Arias, and M Bate. wingless is required for the formation of a subset of muscle founder cells during *Drosophila* embryogenesis. *Development*, 121(11):3829–3837, November 1995. URL <http://eutils.ncbi.nlm.nih.gov/entrez/eutils/efetch.fcgi?dbfrom=pubmed&id=8582292&retmode=ref&cmd=prlinks>.
- [73] M J García-García, P Ramain, P Simpson, and J Modolell. Different contributions of pannier and wingless to the patterning of the dorsal mesothorax of *Drosophila*. *Development*, 126(16):3523–3532, August 1999. URL <http://eutils.ncbi.nlm.nih.gov/entrez/eutils/efetch.fcgi?dbfrom=pubmed&id=10409499&retmode=ref&cmd=prlinks>.
- [74] C P Heisenberg, M Tada, G J Rauch, L Saude, M L Concha, R Geisler, D L Stemple, J C Smith, and S W Wilson. Silberblick/Wnt11 mediates convergent extension movements during zebrafish gastrulation. *Nature*, 405(6782):76–81, May 2000. doi: 10.1038/35011068. URL <http://eutils.ncbi.nlm.nih.gov/entrez/eutils/efetch.fcgi?dbfrom=pubmed&id=10811221&retmode=ref&cmd=prlinks>.
- [75] Ana M Mateus, Nicole Gorfinkiel, and Alfonso Martinez Arias. Origin and function of fluctuations in cell behaviour and the emergence of patterns. *Semin Cell Dev Biol*, 20(7):877–884, September 2009. doi: 10.1016/j.semcdb.2009.07.009. URL <http://linkinghub.elsevier.com/retrieve/pii/S1084952109001566>.
- [76] Alfonso Martinez Arias and Penelope Hayward. Filtering transcriptional noise during development: concepts and mechanisms. *Nat Rev Genet*, 7(1):34–44, January 2006. doi: 10.1038/nrg1750. URL <http://www.nature.com/doifinder/10.1038/nrg1750>.
- [77] A Bejsovec and Alfonso Martinez Arias. Roles of wingless in patterning the larval epidermis of *Drosophila*. *Development*, 113(2):471–485, October 1991. URL <http://eutils.ncbi.nlm.nih.gov/entrez/eutils/efetch.fcgi?dbfrom=pubmed&id=1782860&retmode=ref&cmd=prlinks>.

- [78] Cyrille Alexandre, Alberto Baena-Lopez, and Jean-Paul Vincent. Patterning and growth control by membrane-tethered Wingless. *Nature*, 505(7482):180–185, January 2014. doi: 10.1038/nature12879. URL <http://eutils.ncbi.nlm.nih.gov/entrez/eutils/elink.fcgi?dbfrom=pubmed&id=24390349&retmode=ref&cmd=prlinks>.
- [79] J P Couso, S A Bishop, and Alfonso Martinez Arias. The wingless signalling pathway and the patterning of the wing margin in *Drosophila*. *Development*, 120(3):621–636, March 1994. URL <http://eutils.ncbi.nlm.nih.gov/entrez/eutils/elink.fcgi?dbfrom=pubmed&id=8162860&retmode=ref&cmd=prlinks>.
- [80] Silvia Muñoz-Descalzo, Joaquin de Navascues, and Alfonso Martinez Arias. Wnt-Notch signalling: an integrated mechanism regulating transitions between cell states. *Bioessays*, 34(2):110–118, February 2012. doi: 10.1002/bies.201100102. URL <http://eutils.ncbi.nlm.nih.gov/entrez/eutils/elink.fcgi?dbfrom=pubmed&id=22215536&retmode=ref&cmd=prlinks>.
- [81] G G Tortelote and J Manuel Hernández-Hernández. Wnt3 function in the epiblast is required for the maintenance but not the initiation of gastrulation in mice. *Developmental Biology*, 2012. URL <http://www.sciencedirect.com/science/article/pii/S0012160612005544>.
- [82] Jaime A Rivera-Pérez and Terry Magnuson. Primitive streak formation in mice is preceded by localized activation of Brachyury and Wnt3. *Developmental Biology*, 288(2):363–371, December 2005. doi: 10.1016/j.ydbio.2005.09.012. URL <http://linkinghub.elsevier.com/retrieve/pii/S0012160605006196>.
- [83] T A Pelton, S Sharma, T C Schulz, J Rathjen, and P D Rathjen. Transient pluripotent cell populations during primitive ectoderm formation: correlation of in vivo and in vitro pluripotent cell development. *J. Cell. Sci.*, 115(Pt 2):329–339, January 2002. URL <http://eutils.ncbi.nlm.nih.gov/entrez/eutils/elink.fcgi?dbfrom=pubmed&id=11839785&retmode=ref&cmd=prlinks>.
- [84] D A Rappolee, C Basilico, Y Patel, and Z Werb. Expression and function of FGF-4 in peri-implantation development in mouse embryos. *Development*, 120(8):2259–2269, August 1994. URL <http://eutils.ncbi.nlm.nih.gov/entrez/eutils/elink.fcgi?dbfrom=pubmed&id=7925026&retmode=ref&cmd=prlinks>.
- [85] Jackson A Hoffman, Chun-I Wu, and Bradley J Merrill. Tcf7l1 prepares epiblast cells in the gastrulating mouse embryo for lineage specification. *Development*, 140(8):1665–1675, April 2013. doi: 10.1242/dev.087387. URL <http://eutils.ncbi.nlm.nih.gov/entrez/eutils/elink.fcgi?dbfrom=pubmed&id=23487311&retmode=ref&cmd=prlinks>.
- [86] Anne Camus, Aitana Perea-Gomez, Anne Moreau, and Jérôme Collignon. Absence of Nodal signaling promotes precocious neural differentiation in the mouse embryo. *Developmental Biology*, 295(2):743–755, July 2006. doi: 10.1016/j.ydbio.2006.03.047. URL <http://linkinghub.elsevier.com/retrieve/pii/S0012160606002582>.
- [87] Steffen Biechele, Brian J Cox, and Janet Rossant. Porcupine homolog is required for canonical Wnt signaling and gastrulation in mouse embryos. *Developmental Biology*, 355(2):275–285, July 2011. doi: 10.1016/j.ydbio.2011.04.029. URL <http://linkinghub.elsevier.com/retrieve/pii/S0012160611002764>.
- [88] S Biechele, K Cockburn, F Lanner, and B J Cox. Porcn-dependent Wnt signaling is not required prior to mouse gastrulation. *Development*, 140(13):2961–2971, 2013. doi: 10.1242/dev.094458. URL <http://dev.biologists.org/content/early/2013/06/12/dev.094458.short>.
- [89] Caroline Kemp, Erik Willems, Shaaban Abdo, Louis Lambiv, and Luc Leyns. Expression of all Wnt genes and their secreted antagonists during mouse blastocyst and postimplantation development. *Dev. Dyn.*, 233(3):1064–1075, July 2005. doi: 10.1002/dvdy.20408. URL <http://eutils.ncbi.nlm.nih.gov/entrez/eutils/elink.fcgi?dbfrom=pubmed&id=15880404&retmode=ref&cmd=prlinks>.
- [90] M P Stavridis, J S Lunn, B J Collins, and K G Storey. A discrete period of FGF-induced Erk1/2 signalling is required for vertebrate neural specification. *Development*, 134(16):2889–2894, July 2007. doi: 10.1242/dev.02858. URL <http://dev.biologists.org/cgi/doi/10.1242/dev.02858>.
- [91] T Kunath, M K Saba-El-Leil, M Almousailleakh, J Wray, S Meloche, and A Smith. FGF stimulation of the Erk1/2 signalling cascade triggers transition of pluripotent embryonic stem cells from self-renewal to lineage commitment. *Development*, 134(16):2895–2902, July 2007. doi: 10.1242/dev.02880. URL <http://dev.biologists.org/cgi/doi/10.1242/dev.02880>.



- [92] Boris Greber, Guangming Wu, Christof Bernemann, Jin Young Joo, Dong Wook Han, Kinarm Ko, Natalia Tapia, Davood Sabour, Jared Sterneckert, Paul Tesar, and Hans R Schöler. Conserved and divergent roles of FGF signaling in mouse epiblast stem cells and human embryonic stem cells. *Cell Stem Cell*, 6(3):215–226, March 2010. doi: 10.1016/j.stem.2010.01.003. URL <http://eutils.ncbi.nlm.nih.gov/entrez/eutils/elink.fcgi?dbfrom=pubmed&id=20207225&retmode=ref&cmd=prlinks>.
- [93] Jared Sterneckert, Martin Stehling, Christof Bernemann, Marcos J Araúzo-Bravo, Boris Greber, Luca Gentile, Claudia Ortmeier, Martina Sinn, Guangming Wu, David Ruau, Martin Zenke, Rhea Brintrup, Diana C Klein, Kinarm Ko, and Hans R Schöler. Neural Induction Intermediates Exhibit Distinct Roles of Fgf Signaling. *Stem Cells*, 28(10):1772–1781, October 2010. doi: 10.1002/stem.498. URL <http://doi.wiley.com/10.1002/stem.498>.
- [94] Anne M Boulet and Mario R Capecchi. Signaling by FGF4 and FGF8 is required for axial elongation of the mouse embryo. *Developmental Biology*, 371(2):235–245, November 2012. doi: 10.1016/j.ydbio.2012.08.017. URL <http://linkinghub.elsevier.com/retrieve/pii/S0012160612004575>.
- [95] B G Ciruna, L Schwartz, K Harpal, T P Yamaguchi, and J Rossant. Chimeric analysis of fibroblast growth factor receptor-1 (Fgfr1) function: a role for FGFR1 in morphogenetic movement through the primitive streak. *Development*, 124(14):2829–2841, July 1997. URL <http://dev.biologists.org/content/124/14/2829.abstract>.
- [96] C X Deng, A Wynshaw-Boris, M M Shen, C Daugherty, D M Ornitz, and P Leder. Murine FGFR-1 is required for early postimplantation growth and axial organization. *Genes & Development*, 8(24):3045–3057, December 1994. doi: 10.1101/gad.8.24.3045. URL <http://www.genesdev.org/cgi/doi/10.1101/gad.8.24.3045>.
- [97] B P Davidson, L Cheng, S J Kinder, and PPL Tam. Exogenous FGF-4 Can Suppress Anterior Development in the Mouse Embryo during Neurulation and Early Organogenesis. *Developmental Biology*, 2000. URL <http://www.sciencedirect.com/science/article/pii/S0012160600996635>.
- [98] Xiaoxiao Zhang, Kevin A Peterson, X Shirley Liu, Andrew P McMahon, and Shinsuke Ohba. Gene regulatory networks mediating canonical Wnt signal-directed control of pluripotency and differentiation in embryo stem cells. *Stem Cells*, 31(12):2667–2679, December 2013. doi: 10.1002/stem.1371. URL <http://eutils.ncbi.nlm.nih.gov/entrez/eutils/elink.fcgi?dbfrom=pubmed&id=23505158&retmode=ref&cmd=prlinks>.
- [99] K Dorey and E Amaya. FGF signalling: diverse roles during early vertebrate embryogenesis. *Development*, 137(22):3731–3742, October 2010. doi: 10.1242/dev.037689. URL <http://dev.biologists.org/cgi/doi/10.1242/dev.037689>.
- [100] Cantas Alev, Yuping Wu, Yukiko Nakaya, and Guojun Sheng. Decoupling of amniote gastrulation and streak formation reveals a morphogenetic unity in vertebrate mesoderm induction. *Development*, May 2013. doi: 10.1242/dev.094318. URL <http://eutils.ncbi.nlm.nih.gov/entrez/eutils/elink.fcgi?dbfrom=pubmed&id=23698348&retmode=ref&cmd=prlinks>.
- [101] Madeline A Lancaster, Magdalena Renner, Carol-Anne Martin, Daniel Wenzel, Louise S Bicknell, Matthew E Hurles, Tessa Homfray, Josef M Penninger, Andrew P Jackson, and Juergen A Knoblich. Cerebral organoids model human brain development and microcephaly. *Nature*, 501(7467):373–379, September 2013. doi: 10.1038/nature12517. URL <http://eutils.ncbi.nlm.nih.gov/entrez/eutils/elink.fcgi?dbfrom=pubmed&id=23995685&retmode=ref&cmd=prlinks>.
- [102] Tokushige Nakano, Satoshi Ando, Nozomu Takata, Masako Kawada, Keiko Muguruma, Kiyotoshi Sekiguchi, Koichi Saito, Shigenobu Yonemura, Mototsugu Eiraku, and Yoshiki Sasai. Self-formation of optic cups and storable stratified neural retina from human ESCs. *Cell Stem Cell*, 10(6):771–785, June 2012. doi: 10.1016/j.stem.2012.05.009. URL <http://eutils.ncbi.nlm.nih.gov/entrez/eutils/elink.fcgi?dbfrom=pubmed&id=22704518&retmode=ref&cmd=prlinks>.
- [103] Mototsugu Eiraku, Nozomu Takata, Hiroki Ishibashi, Masako Kawada, Eriko Sakakura, Satoru Okuda, Kiyotoshi Sekiguchi, Taiji Adachi, and Yoshiki Sasai. Self-organizing optic-cup morphogenesis in three-dimensional culture. *Nature*, 472(7341):51–56, April 2011. doi: 10.1038/nature09941. URL <http://eutils.ncbi.nlm.nih.gov/entrez/eutils/elink.fcgi?dbfrom=pubmed&id=21475194&retmode=ref&cmd=prlinks>.

- [104] Mototsugu Eiraku, Kiichi Watanabe, Mami Matsuo-Takasaki, Masako Kawada, Shigenobu Yone-mura, Michiru Matsumura, Takafumi Wataya, Ayaka Nishiyama, Keiko Muguruma, and Yoshiaki Sai. Self-organized formation of polarized cortical tissues from ESCs and its active manipulation by extrinsic signals. *Cell Stem Cell*, 3(5):519–532, November 2008. doi: 10.1016/j.stem.2008.09.002. URL <http://eutils.ncbi.nlm.nih.gov/entrez/eutils/efetch.fcgi?dbfrom=pubmed&id=18983967&retmode=ref&cmd=prlinks>.
- [105] N Fossat, V Jones, P L Khoo, D Bogani, A Hardy, K Steiner, M Mukhopadhyay, H Westphal, P M Nolan, R Arkell, and P P L Tam. Stringent requirement of a proper level of canonical WNT signalling activity for head formation in mouse embryo. *Development*, 138(4):667–676, January 2011. doi: 10.1242/dev.052803. URL <http://dev.biologists.org/cgi/doi/10.1242/dev.052803>.
- [106] Nicolas Fossat, Vanessa Jones, Maria J García-García, and Patrick P L Tam. Modulation of WNT signaling activity is key to the formation of the embryonic head. *Cell Cycle*, 11(1):26–32, January 2012. doi: 10.4161/cc.11.1.18700. URL <http://eutils.ncbi.nlm.nih.gov/entrez/eutils/efetch.fcgi?dbfrom=pubmed&id=22157093&retmode=ref&cmd=prlinks>.
- [107] Claudio D Stern and Karen M Downs. The hypoblast (visceral endoderm): an evo-devo perspective. *Development*, 139(6):1059–1069, March 2012. doi: 10.1242/dev.070730. URL <http://eutils.ncbi.nlm.nih.gov/entrez/eutils/efetch.fcgi?dbfrom=pubmed&id=22354839&retmode=ref&cmd=prlinks>.
- [108] A Perea-Gómez, M Rhinn, and S.L. Ang. Role of the anterior visceral endoderm in restricting posterior signals in the mouse embryo. *Int. J. Dev. Biol.*, 45(1):311–320, 2001. URL <http://eutils.ncbi.nlm.nih.gov/entrez/eutils/efetch.fcgi?dbfrom=pubmed&id=11291861&retmode=ref&cmd=prlinks>.
- [109] Cynthia Lilian Andoniadou and Juan Pedro Martinez-Barbera. Developmental mechanisms directing early anterior forebrain specification in vertebrates. *Cell. Mol. Life Sci.*, 70(20):3739–3752, October 2013. doi: 10.1007/s00018-013-1269-5. URL <http://eutils.ncbi.nlm.nih.gov/entrez/eutils/efetch.fcgi?dbfrom=pubmed&id=23397132&retmode=ref&cmd=prlinks>.
- [110] A Di-Gregorio, M Sancho, D W Stuckey, L A Crompton, J Godwin, Y Mishina, and T A Rodriguez. BMP signalling inhibits premature neural differentiation in the mouse embryo. *Development*, 134(18):3359–3369, August 2007. doi: 10.1242/dev.005967. URL <http://dev.biologists.org/cgi/doi/10.1242/dev.005967>.
- [111] N Ray Dunn, Stéphane D Vincent, Leif Oxburgh, Elizabeth J Robertson, and Elizabeth K Bikoff. Combinatorial activities of Smad2 and Smad3 regulate mesoderm formation and patterning in the mouse embryo. *Development*, 131(8):1717–1728, April 2004. doi: 10.1242/dev.01072. URL <http://eutils.ncbi.nlm.nih.gov/entrez/eutils/efetch.fcgi?dbfrom=pubmed&id=15084457&retmode=ref&cmd=prlinks>.
- [112] S D Vincent. Cell fate decisions within the mouse organizer are governed by graded Nodal signals. *Genes & Development*, 17(13):1646–1662, June 2003. doi: 10.1101/gad.1100503. URL <http://www.genesdev.org/cgi/doi/10.1101/gad.1100503>.
- [113] Yeh-Chuin Poh, Junwei Chen, Ying Hong, Haiying Yi, Shuang Zhang, Junjian Chen, Douglas C Wu, Lili Wang, Qiong Jia, Rishi Singh, Wenting Yao, Youhua Tan, Arash Tajik, Tetsuya S Tanaka, and Ning Wang. Generation of organized germ layers from a single mouse embryonic stem cell. *Nat Commun*, 5:4000, 2014. doi: 10.1038/ncomms5000. URL <http://eutils.ncbi.nlm.nih.gov/entrez/eutils/efetch.fcgi?dbfrom=pubmed&id=24873804&retmode=ref&cmd=prlinks>.
- [114] Aryeh Warmflash, Benoit Sorre, Fred Etoc, Eric D Siggia, and Ali H Brivanlou. A method to recapitulate early embryonic spatial patterning in human embryonic stem cells. *Nature Methods*, 11(8):847–854, June 2014. doi: 10.1038/nmeth.3016. URL <http://www.nature.com/doi/10.1038/nmeth.3016>.
- [115] A Nagy, M Gertsenstein, K Vintersten, and R Behringer. Karyotyping Mouse Cells. *Cold Spring Harbor Protocols*, 2008(6):pdb.prot4706–pdb.prot4706, May 2008. doi: 10.1101/pdb.prot4706. URL <http://www.cshprotocols.org/cgi/doi/10.1101/pdb.prot4706>.
- [116] D B Ring, K W Johnson, E J Henriksen, J M Nuss, D Goff, T R Kinnick, S T Ma, J W Reeder, I Samuels, T Slabick, A S Wagman, M E W Hammond, and S D Harrison. Selective Glycogen Synthase Kinase 3 Inhibitors Potentiate Insulin Activation of Glucose Transport and Utilization In Vitro and In Vivo. *Diabetes*, 52(3):588–595, March 2003. doi: 10.2337/diabetes.52.3.588. URL <http://diabetes.diabetesjournals.org/cgi/doi/10.2337/diabetes.52.3.588>.
- [117] Barrett S D, Biwersi C, Kaufman M, Tecle H, and Warmus J S. Preparation of oxygenated esters of 4-iodophenylaminobenzhydroxyamic acids as MEK inhibitors. World Pat, April 2002.

- [118] M Diana Neely, Michael J Litt, Andrew M Tidball, Gary G Li, Asad A Aboud, Corey R Hopkins, Reed Chamberlin, Charles C Hong, Kevin C Ess, and Aaron B Bowman. DMH1, a highly selective small molecule BMP inhibitor promotes neurogenesis of hiPSCs: comparison of PAX6 and SOX1 expression during neural induction. *ACS Chem Neurosci*, 3(6):482–491, June 2012. doi: 10.1021/cn300029t. URL <http://eutils.ncbi.nlm.nih.gov/entrez/eutils/elink.fcgi?dbfrom=pubmed&id=22860217&retmode=ref&cmd=prlinks>.
- [119] Jijun Hao, Joshua N Ho, Jana A Lewis, Kaleh A Karim, R Nathan Daniels, Patrick R Gentry, Corey R Hopkins, Craig W Lindsley, and Charles C Hong. In vivo structure-activity relationship study of dorsomorphin analogues identifies selective VEGF and BMP inhibitors. *ACS Chem. Biol.*, 5(2):245–253, February 2010. doi: 10.1021/cb9002865. URL <http://eutils.ncbi.nlm.nih.gov/entrez/eutils/elink.fcgi?dbfrom=pubmed&id=20020776&retmode=ref&cmd=prlinks>.

## 5 Supplemental Material

### 5.1 Supplemental Tables

|           |             | Species | Dilution | Cat. Number | Supplier                   |
|-----------|-------------|---------|----------|-------------|----------------------------|
| Primary   | Brachyury   | Goat    | 1:200    | sc-17743    | Santa Cruz Biotechnologies |
|           | Nanog       | Mouse   | 1:300    | 14-5761-80  | e-Biosciences              |
|           | GFP         | Rabbit  | 1:500    | A11122      | Molecular Probes           |
| Secondary | Goat-A633   | Donkey  | 1:500    | A21082      | Molecular Probes           |
|           | Mouse-A568  | Donkey  | 1:500    | A10037      | Molecular Probes           |
|           | Rabbit-A488 | Donkey  | 1:500    | A21206      | Molecular Probes           |
|           | Hoechst3342 | n/a     | 1:1000   | H3570       | Invitrogen (ThermoFisher)  |

Table 1: Antibodies used for *Gastruloid* immunostaining.

| Cell Line                     |          | Cells/40 $\mu$ l | 48h Diameter ( $\mu$ m)        |
|-------------------------------|----------|------------------|--------------------------------|
| AR8::mCherry                  | [18]     | 550              | 182.7 $\pm$ 17.3 ( $n = 83$ )  |
| Bra::GFP                      | [16]     | 400              | 161.0 $\pm$ 26.2 ( $n = 222$ ) |
| IBRE4::mCerulean              | [18]     | 400              | 152.6 $\pm$ 12.2 ( $n = 39$ )  |
| Nodal <sup>condHBE::YFP</sup> | [17]     | 500              | 138.7 $\pm$ 16.1 ( $n = 124$ ) |
| TLC2                          | [19, 20] | 400              | 194.9 $\pm$ 20.7 ( $n = 56$ )  |

Table 2: Cell lines used and numbers of cells required for *Gastruloid* culture. The average diameter of the *Gastruloids* at 48h post formation is indicated with the standard deviation and the number of *Gastruloids* measured from at least two replicate experiments.

| Small Molecule/<br>Recombinant protein |            | Working Conc. | Stock Conc.    | Supplier           |
|----------------------------------------|------------|---------------|----------------|--------------------|
| CHI99201                               | [116]      | 3 $\mu$ M     | 10mM           | Tocris Biosciences |
| PD0325901                              | [117]      | 1 $\mu$ M     | 10mM           |                    |
| SB431542                               | [34]       | 10 $\mu$ M    | 100mM          |                    |
| DMH1                                   | [118, 119] | 0.5nM         | 5mM            |                    |
| IWP3                                   | [35]       | 1 $\mu$ M     | 5mM            |                    |
| XAV939                                 | [36]       | 1 $\mu$ M     | 10mM           |                    |
| Wnt3a                                  |            | 100ng/ml      | 40 $\mu$ g/ml  | R&D systems        |
| DKK                                    |            | 200ng/ml      | 100 $\mu$ g/ml |                    |
| Nodal                                  |            | 1 $\mu$ g/ml  | 50 $\mu$ g/ml  |                    |
| Noggin                                 |            | 500ng/ml      | 100 $\mu$ g/ml |                    |
| Chordin                                |            | 500ng/ml      | 200 $\mu$ g/ml |                    |
| FGF2                                   |            | 10ng/ml       | 100 $\mu$ g/ml |                    |

Table 3: Concentrations of Small molecules and recombinant proteins used in this study. Conc: Concentration



| Gene           | Forward Primer Sequence  | Reverse Primer Sequence  |
|----------------|--------------------------|--------------------------|
| <i>Axin2</i>   | CTAGACTACGGCCATCAGGAA    | GCTGGCAGACAGGACATACA     |
| <i>Bmp4</i>    | CTCAAGGGAGTGGAGATTGG     | ATGCTTGGGACTACGTTTGG     |
| <i>Cer1</i>    | GGAAACGCCATAAGTCTCCA     | AGGGTCAGAATTTGCCATTG     |
| <i>Chordin</i> | GTGCCTCTGCTCTGCTTCTT     | AGGAGTTCGCATGGATATGG     |
| <i>Dkk1</i>    | CCATTCTGGCCAACTCTTTC     | CATTCCCTCCCTTCCAATAAC    |
| <i>Fgf4</i>    | GGCCACTCCACAGAGATAGG     | ACTTGGGCTCAAGCAGTAGG     |
| <i>Fgf5</i>    | GCTCAATGATCAGAAGGAGGA    | TCAGCTGGTCTTGAATGAGG     |
| <i>Fgf8</i>    | AGGACTGCGTATTCACAGAGAT   | CATGTACCAGCCCTCGTACT     |
| <i>Lefty1</i>  | AGGGTGCAGACCTGTAGCTG     | GGAAGCAAAGAGCACACACA     |
| <i>Nodal</i>   | AGCCACTGTCCAGTTCTCCAG    | GTGTCTGCCAAGCATAACATCTC  |
| <i>Noggin</i>  | CCCATCATTTCCGAGTGTAAG    | CTCGCTAGAGGGTGGTGAAA     |
| <i>ppia</i>    | TTACCCATCAAACCATTCCTTCTG | AACCCAAAGAACTTCAGTGAGAGC |
| <i>SPRY4</i>   | ATGGTGGATGTCGATCCTGT     | GGAGGGGGAGCTACAGAGAC     |
| <i>T/Bra</i>   | CTGGGAGCTCAGTTCTTTTCG    | GTCCACGAGGCTATGAGGAG     |
| <i>Wnt3</i>    | CTAATGCTGGCTTGACGAGG     | ACATGGTAGAGAGTGCAGGC     |
| <i>Wnt3a</i>   | CATACAGGAGTGTGCCTGGA     | AATCCAGTGGTGGGTGATA      |

Table 4: Primer Sequences used for qRT-PCR.

|     | Condition | No Expression | Polarised   | Ubiquitous  | Spherical   | Ovoid       | Elongated   | <i>n</i> |
|-----|-----------|---------------|-------------|-------------|-------------|-------------|-------------|----------|
| 24h | N2B27     | 26.8 (21.5)   | 62.5 (16.1) | 10.7 (15.2) | 100.0 (0.0) | 0.0 (0.0)   | 0.0 (0.0)   | 112      |
| 48h | N2B27     | 23.7 (13.2)   | 74.1 (11.8) | 2.2 (3.4)   | 67.0 (9.4)  | 33.0 (9.4)  | 0.0 (0.0)   | 140      |
| 72h | DMSO      | 3.6 (-)       | 89.3 (-)    | 7.1 (-)     | 10.7 (-)    | 85.7 (-)    | 3.6 (-)     | 28       |
|     | Chi       | 0 (-)         | 91.2 (11.7) | 8.8 (11.7)  | 23.3 (18.2) | 52.9 (18.1) | 23.8 (26.3) | 82       |

Table 5: Expression phenotype of Bra::GFP mouse ESCs. The proportion of Bra::GFP *Gastruloids* not expressing the reporter (No Expression) or displaying either Polarised or Ubiquitous expression at 24, 48 and 72h AA when maintained in N2B27 (24, 48, 72h) or following a pulse of DMSO or Chi (72h). The standard deviation is shown in brackets and the number of *Gastruloids* analysed are shown (*n*).

|                    | Pearson Correlation Coefficient |       |           |         |
|--------------------|---------------------------------|-------|-----------|---------|
|                    | 24h                             | 48h   | N2B27 72h | Chi 72h |
| a) Nodal:Brachyury | -0.029                          | 0.592 | 0.807     | 0.643   |
| b) Nodal:Nanog     | 0.112                           | 0.452 | 0.814     | 0.280   |
| c) Bra:Nanog       | 0.391                           | 0.443 | 0.731     | 0.327   |

Table 6: Pearson Correlation Coefficients between a) Nodal and Brachyury, b) Nodal and Nanog and c) Brachyury and Nanog in the Nodal<sup>condHBE::YFP</sup> mouse ESC line at 24, 48 and 72h with or without a pulse of Chi on day 3. Values to 3d.p., correlations from one representative *Gastruloid*
